# Supplementary material
Source: PubMed Central journal article supplement (PMC7462354)
Supplement: 40615_2020_833_MOESM1_ESM.pdf [file 40615_2020_833_MOESM1_ESM.pdf]

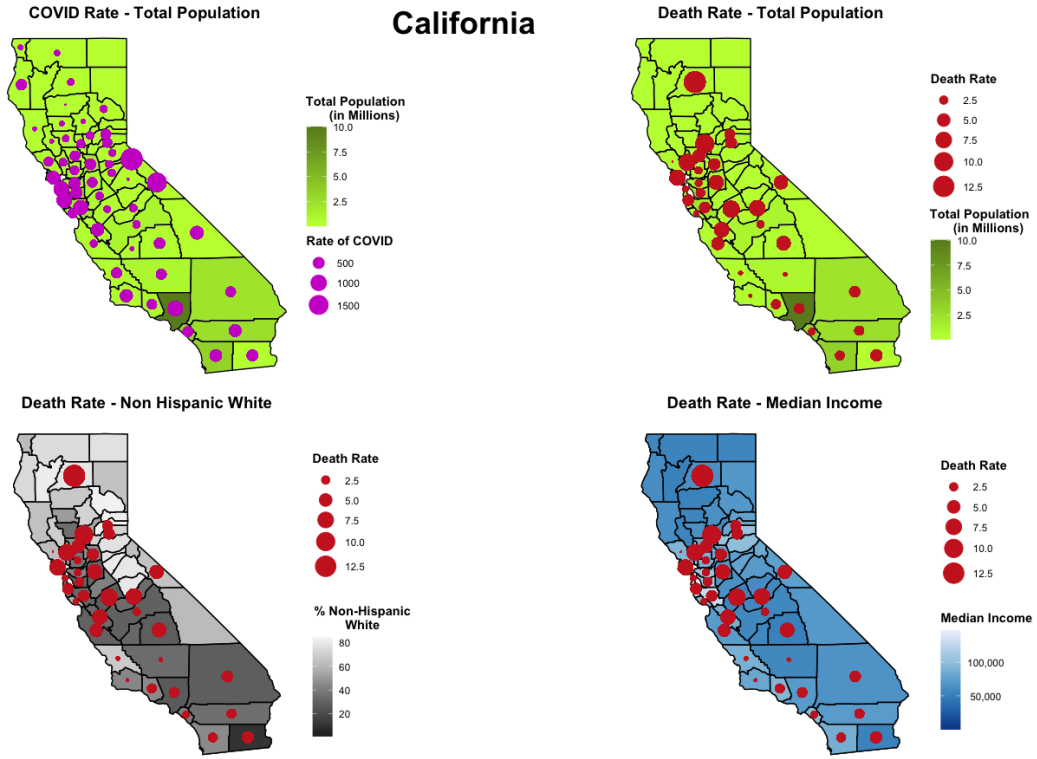

Figure S1

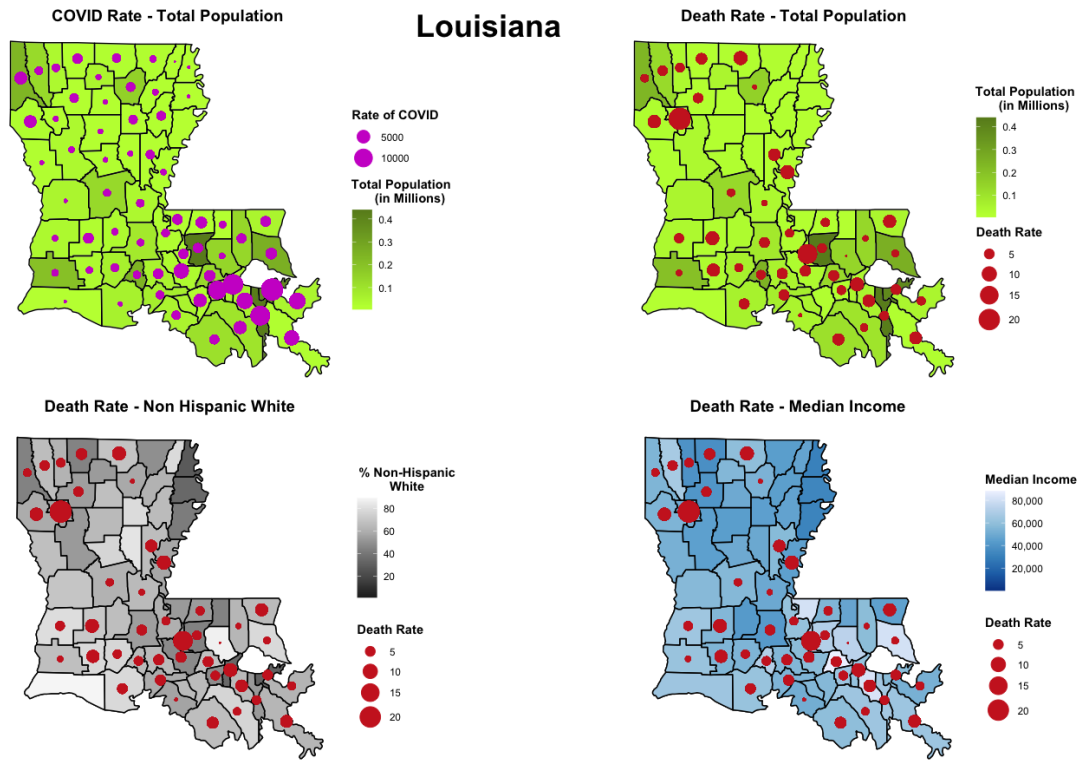

Figure S2

# Massachusetts

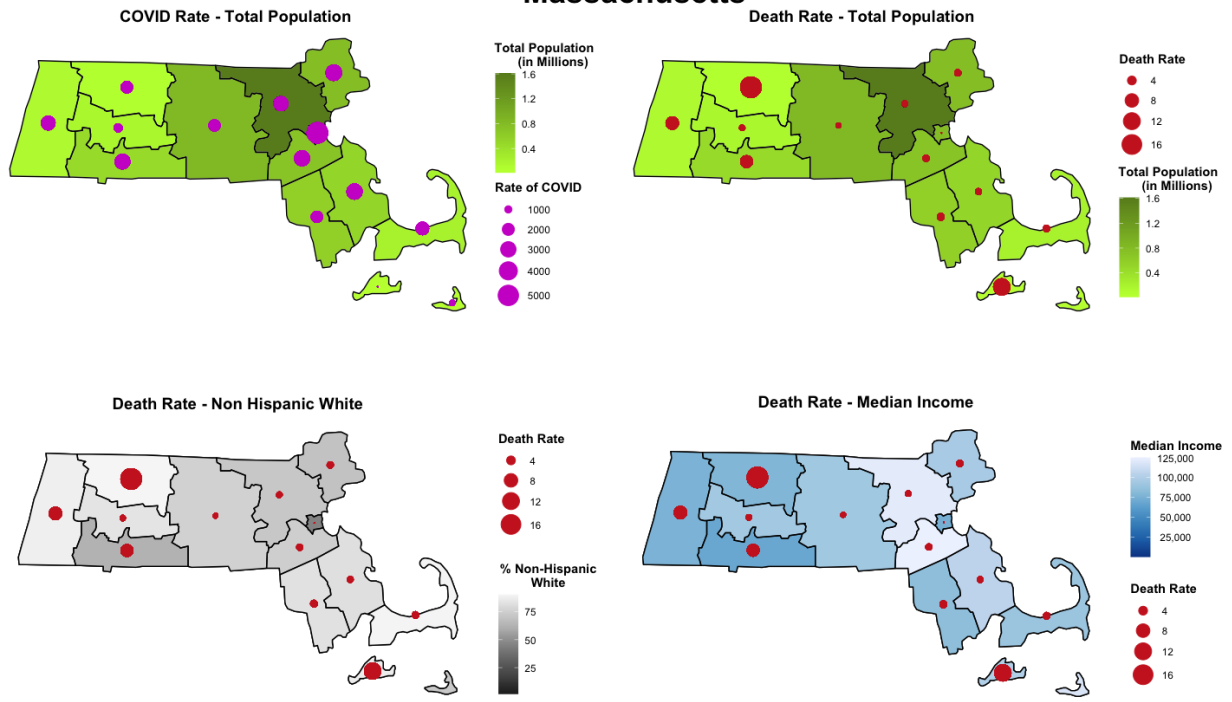

Figure S3

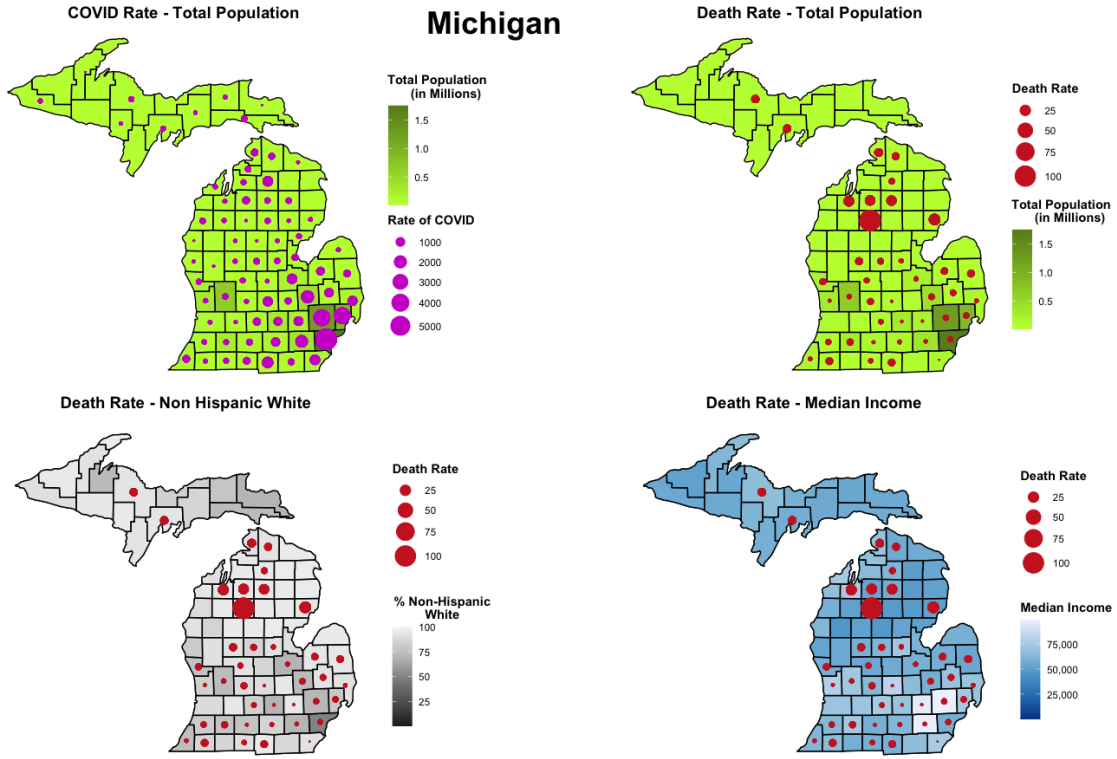

Figure S4

COVID Rate - Total Population

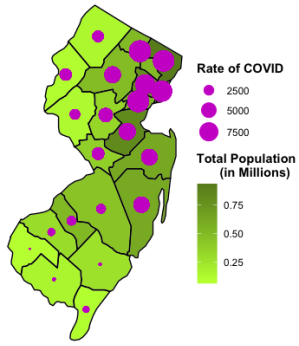

# New Jersey

Death Rate - Total Population

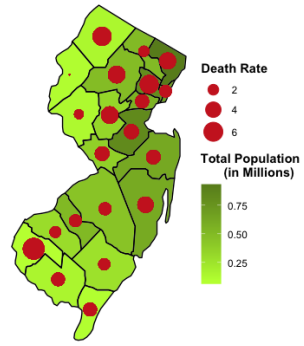

Death Rate - Non Hispanic White

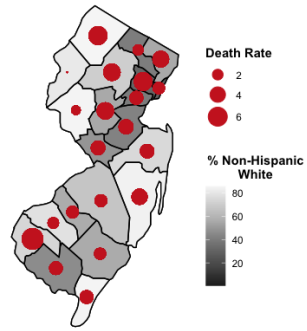

Death Rate - Median Income

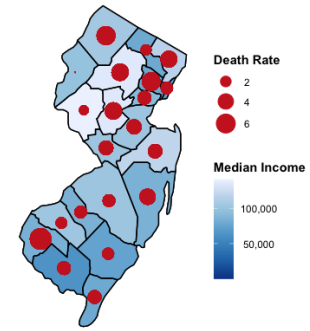

Figure S5

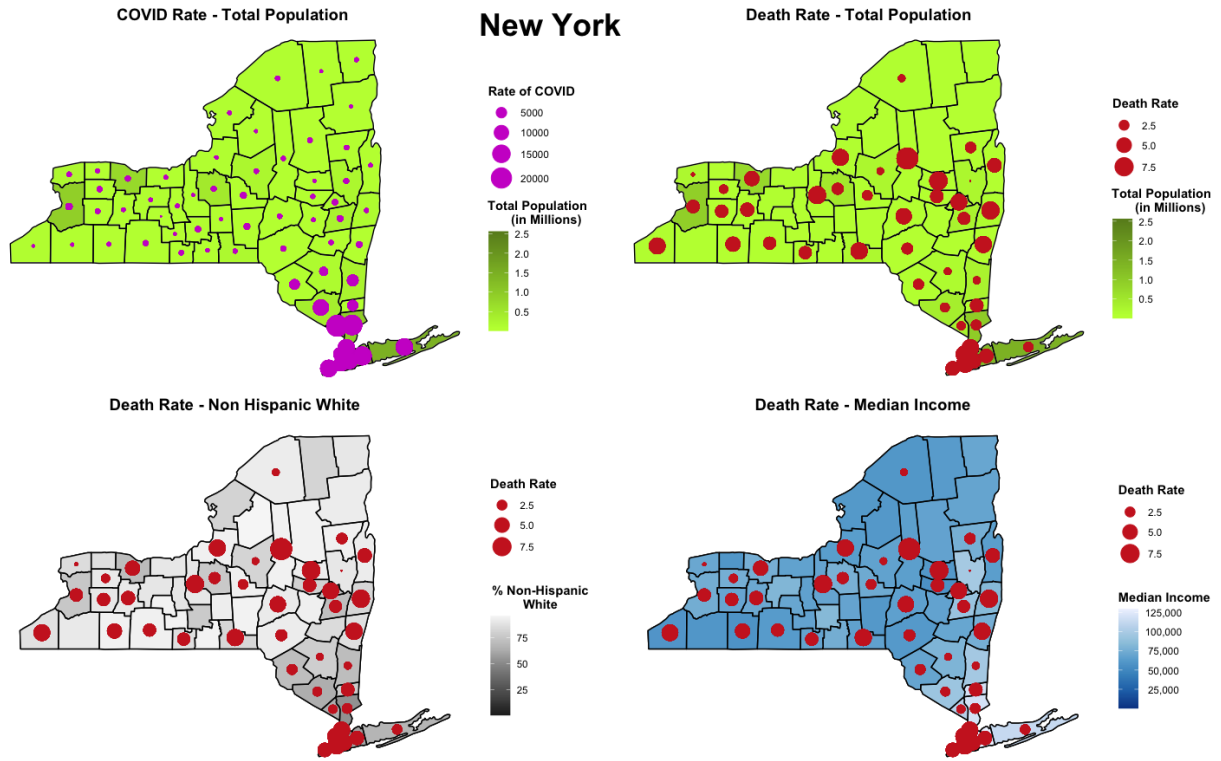

Figure S6
