# Supplementary material
Source: PubMed Central journal article supplement (PMC7462354)
Supplement: 40615_2020_833_MOESM3_ESM.pdf [file 40615_2020_833_MOESM3_ESM.pdf]

**Table S1.** Data elements and comprehensive summary statistics of the variables used in this study.

| Variables                             | N                                                                                                                                                  |         |         | Mean   | Median | Std. Deviation | Minimum | Maximum | Percentiles |       |        |       |
|---------------------------------------|----------------------------------------------------------------------------------------------------------------------------------------------------|---------|---------|--------|--------|----------------|---------|---------|-------------|-------|--------|-------|
|                                       | Valid                                                                                                                                              | Missing | Outlier |        |        |                |         |         | 25          | 50    | 75     |       |
| TOTAL POPULATION                      | 346                                                                                                                                                | 0       | 23      | 155080 | 64284  | 202686         | 1129    | 918702  | 27725       | 64284 | 182875 |       |
| Rate of COVID in one in Million       | 325                                                                                                                                                | 38      | 6       | 912.2  | 497.8  | 1034.3         | 15.4    | 5094.0  | 224.3       | 497.8 | 1170.3 |       |
| Rate of COVID related Death (percent) | 218                                                                                                                                                | 139     | 12      | 4.1    | 3.4    | 2.7            | 0.3     | 15.8    | 2.2         | 3.4   | 5.6    |       |
| Change-in mobility                    | GOOGLE RETAIL RECREATION MOBILITY                                                                                                                  | 353     | 14      | 2      | -0.5   | -0.5           | 0.1     | -1.0    | 0.0         | -0.6  | -0.5   | -0.4  |
|                                       | GOOGLE GROCERY PHARMACY MOBILITY                                                                                                                   | 354     | 15      | 0      | -0.2   | -0.2           | 0.1     | -0.7    | 0.3         | -0.3  | -0.2   | -0.1  |
|                                       | GOOGLE PARKS MOBILITY                                                                                                                              | 201     | 168     | 0      | 0.0    | -0.1           | 0.6     | -0.9    | 1.8         | -0.5  | -0.1   | 0.5   |
|                                       | GOOGLE TRANSIT MOBILITY                                                                                                                            | 198     | 169     | 2      | -0.5   | -0.5           | 0.2     | -0.9    | 0.1         | -0.6  | -0.5   | -0.4  |
|                                       | GOOGLE WORKPLACE MOBILITY                                                                                                                          | 356     | 13      | 2      | -0.4   | -0.4           | 0.1     | -0.6    | -0.2        | -0.4  | -0.4   | -0.3  |
|                                       | GOOGLE RESIDENTIAL MOBILITY                                                                                                                        | 282     | 87      | 0      | 0.1    | 0.1            | 0.1     | 0.0     | 0.3         | 0.1   | 0.1    | 0.2   |
| PC                                    | Percent Has computer with broadband Internet subscription                                                                                          | 368     | 0       | 1      | 28.8   | 29.6           | 4.0     | 13.9    | 38.5        | 27.0  | 29.6   | 31.5  |
| Race                                  | Percent BA (Black Alone) MALE                                                                                                                      | 359     | 0       | 10     | 4.7    | 2.5            | 5.3     | 0.0     | 23.0        | 0.9   | 2.5    | 6.3   |
|                                       | Percent BA (Black Alone) FEMALE                                                                                                                    | 359     | 0       | 10     | 4.2    | 1.4            | 5.7     | 0.1     | 24.0        | 0.4   | 1.4    | 6.1   |
|                                       | Percent AA (Asian Alone) MALE                                                                                                                      | 349     | 0       | 20     | 1.0    | 0.5            | 1.2     | 0.0     | 5.7         | 0.2   | 0.5    | 1.4   |
|                                       | Percent AA (Asian Alone) FEMALE                                                                                                                    | 346     | 0       | 23     | 1.1    | 0.6            | 1.2     | 0.0     | 5.6         | 0.3   | 0.6    | 1.4   |
|                                       | Percent NHWA (non-Hispanic White Alone) MALE                                                                                                       | 369     | 0       | 0      | 37.1   | 39.8           | 9.9     | 4.5     | 50.3        | 31.5  | 39.8   | 45.4  |
|                                       | Percent NHWA (non-Hispanic White Alone) FEMALE                                                                                                     | 369     | 0       | 0      | 37.6   | 40.3           | 10.0    | 4.7     | 49.0        | 31.7  | 40.3   | 46.1  |
|                                       | Percent H (Hispanic) MALE                                                                                                                          | 348     | 0       | 21     | 3.8    | 2.2            | 3.9     | 0.4     | 17.7        | 1.1   | 2.2    | 4.9   |
|                                       | Percent H (Hispanic) FEMALE                                                                                                                        | 348     | 0       | 21     | 3.5    | 1.8            | 3.8     | 0.4     | 17.1        | 1.0   | 1.8    | 4.6   |
| Income                                | Median Family income, past 2 months 208                                                                                                            | 364     | 0       | 5      | 68969  | 64524          | 17648   | 30717   | 131554      | 57512 | 64524  | 75863 |
|                                       | Percent below poverty level Population for whom poverty status is determined                                                                       | 366     | 0       | 3      | 14.9   | 14.3           | 5.2     | 4.6     | 33.5        | 11.3  | 14.3   | 17.7  |
|                                       | Percent below poverty level Population for whom poverty status is determined SEX Male                                                              | 367     | 0       | 2      | 13.6   | 13.1           | 5.1     | 4.2     | 33.2        | 10.2  | 13.1   | 16.1  |
|                                       | Percent below poverty level Population for whom poverty status is determined SEX Female                                                            | 367     | 0       | 2      | 16.2   | 15.8           | 5.7     | 4.8     | 38.5        | 12.2  | 15.8   | 19.2  |
|                                       | Percent below poverty level Population for whom poverty status is determined RACE AND HISPANIC OR LATINO ORIGIN Black or African American alone    | 368     | 1       | 0      | 32.3   | 30.0           | 17.7    | 0.6     | 100.0       | 19.9  | 30.0   | 41.0  |
|                                       | Percent below poverty level Population for whom poverty status is determined RACE AND HISPANIC OR LATINO ORIGIN Asian alone                        | 359     | 5       | 5      | 14.7   | 11.6           | 13.2    | 0.0     | 70.1        | 5.1   | 11.6   | 21.5  |
|                                       | Percent bel poverty Pop for whom poverty is determined RACE AND HISPANIC OR LATINO ORIGIN Hispanic or Latino origin of any race                    | 365     | 0       | 4      | 24.0   | 22.5           | 11.0    | 0.0     | 68.7        | 16.3  | 22.5   | 29.6  |
|                                       | Percent below poverty level Population for whom poverty status is determined RACE AND HISPANIC OR LATINO ORIGIN White alone not Hispanic or Latino | 369     | 0       | 0      | 11.8   | 11.7           | 4.1     | 3.2     | 26.4        | 8.8   | 11.7   | 14.6  |
| Education                             | Percent below poverty level Population for whom poverty status is determined RACE AND HISPANIC OR LATINO ORIGIN White alone                        | 367     | 0       | 2      | 87.7   | 88.9           | 5.3     | 69.4    | 96.1        | 85.5  | 88.9   | 91.0  |
|                                       | Percent Population 25 years and over Bachelors degree or higher                                                                                    | 369     | 0       | 0      | 24.6   | 21.7           | 10.8    | 7.4     | 60.8        | 16.3  | 21.7   | 31.5  |
|                                       | Percent RACE AND HISPANIC OR LATINO ORIGIN BY EDUCATIONAL ATTAINMENT White alone not Hispanic or Latino High school graduate or higher             | 369     | 0       | 0      | 90.8   | 91.3           | 4.0     | 76.2    | 98.3        | 88.9  | 91.3   | 93.6  |
|                                       | Percent RACE AND HISPANIC OR LATINO ORIGIN BY EDUCATIONAL ATTAINMENT White alone not Hispanic or Latino Bachelors degree or higher                 | 368     | 0       | 1      | 27.0   | 23.2           | 12.4    | 10.7    | 76.4        | 17.5  | 23.2   | 33.9  |
|                                       | Percent RACE AND HISPANIC OR LATINO ORIGIN BY EDUCATIONAL ATTAINMENT Black alone High school graduate or higher                                    | 366     | 0       | 3      | 81.3   | 82.6           | 9.7     | 40.8    | 100.0       | 76.1  | 82.6   | 88.0  |
|                                       | Percent RACE AND HISPANIC OR LATINO ORIGIN BY EDUCATIONAL ATTAINMENT Black alone Bachelors degree or higher                                        | 369     | 0       | 0      | 16.2   | 14.2           | 10.9    | 0.0     | 69.6        | 7.9   | 14.2   | 23.6  |
|                                       | Percent RACE AND HISPANIC OR LATINO ORIGIN BY EDUCATIONAL ATTAINMENT Asian alone High school graduate or higher                                    | 356     | 6       | 7      | 85.5   | 87.3           | 10.2    | 52.1    | 100.0       | 79.3  | 87.3   | 92.8  |
|                                       | Percent RACE AND HISPANIC OR LATINO ORIGIN BY EDUCATIONAL ATTAINMENT Asian alone Bachelors degree or higher                                        | 363     | 6       | 0      | 45.4   | 46.5           | 20.8    | 0.0     | 100.0       | 32.3  | 46.5   | 57.7  |
|                                       | Percent RACE AND HISPANIC OR LATINO ORIGIN BY EDUCATIONAL ATTAINMENT Hispanic or Latino Origin High school graduate or higher                      | 368     | 1       | 0      | 72.9   | 73.2           | 12.3    | 22.2    | 100.0       | 66.2  | 73.2   | 81.4  |
|                                       | Percent RACE AND HISPANIC OR LATINO ORIGIN BY EDUCATIONAL ATTAINMENT Hispanic or Latino Origin Bachelors degree or higher                          | 368     | 1       | 0      | 15.4   | 14.4           | 9.0     | 0.0     | 50.3        | 9.3   | 14.4   | 20.2  |
| Disability / Insurance                | Percent with a disability Subject Total civilian noninstitutionalized population                                                                   | 369     | 0       | 0      | 15.0   | 14.9           | 3.6     | 6.5     | 28.5        | 12.5  | 14.9   | 17.1  |
|                                       | Percent Insured Civilian noninstitutionalized population SEX Male                                                                                  | 368     | 0       | 1      | 91.5   | 92.3           | 3.2     | 80.5    | 97.5        | 89.2  | 92.3   | 94.0  |
|                                       | Percent Insured Civilian noninstitutionalized population SEX Female                                                                                | 367     | 0       | 2      | 93.7   | 94.4           | 2.8     | 81.1    | 98.4        | 91.9  | 94.4   | 95.7  |
|                                       | Percent Insured Civilian noninstitutionalized population RACE AND HISPANIC OR LATINO ORIGIN Black or African American alone                        | 365     | 1       | 3      | 91.6   | 92.4           | 5.4     | 71.4    | 100.0       | 88.9  | 92.4   | 95.4  |
|                                       | Percent Insured Civilian noninstitutionalized population RACE AND HISPANIC OR LATINO ORIGIN Asian alone                                            | 347     | 5       | 17     | 92.4   | 93.5           | 6.5     | 67.0    | 100.0       | 89.4  | 93.5   | 96.9  |
|                                       | Percent Insured Civilian noninstitutionalized population RACE AND HISPANIC OR LATINO ORIGIN Hispanic or Latino of any race                         | 364     | 0       | 5      | 86.6   | 88.2           | 8.8     | 55.5    | 100.0       | 83.1  | 88.2   | 92.7  |
|                                       | Percent Insured Civilian noninstitutionalized population RACE AND HISPANIC OR LATINO ORIGIN White alone not Hispanic or Latino                     | 368     | 0       | 1      | 93.9   | 94.4           | 2.6     | 85.1    | 98.4        | 92.4  | 94.4   | 95.8  |
|                                       | Percent Public Coverage Medicaid means tested public coverage alone or in combination                                                              | 369     | 0       | 0      | 23.2   | 22.3           | 6.6     | 6.9     | 48.4        | 19.2  | 22.3   | 27.3  |
