# Supplementary material
Source: PubMed Central journal article supplement (PMC7462354)
Supplement: 40615_2020_833_MOESM4_ESM.pdf [file 40615_2020_833_MOESM4_ESM.pdf]

**Table S2.** Results of Pearson's correlation applied to the comprehensive dataset.

| <u>Detailed variable description</u>                      | <u>Correlations</u> |                     |         |         |         |         |         |        |
|-----------------------------------------------------------|---------------------|---------------------|---------|---------|---------|---------|---------|--------|
|                                                           |                     |                     |         |         |         |         |         |        |
| TOTAL POPULATION                                          | Total_Pop           | Pearson Correlation | 1       | .309**  | -.350** | -.376** | -.293** | .275** |
|                                                           |                     | Sig. (2-tailed)     |         | 0       | 0       | 0       | 0       | 0      |
|                                                           |                     | N                   | 346     | 311     | 195     | 330     | 331     | 178    |
| Rate of COVID in one In Million                           | Rate_COV            | Pearson Correlation | .309**  | 1       | -.202** | -.112*  | -0.021  | .332** |
|                                                           |                     | Sig. (2-tailed)     | 0       |         | 0.005   | 0.047   | 0.717   | 0      |
|                                                           |                     | N                   | 311     | 325     | 191     | 313     | 315     | 176    |
| Rate of COVID related Death (percent)                     | Death_Rate          | Pearson Correlation | -.350** | -.202** | 1       | 0.116   | 0.112   | -0.131 |
|                                                           |                     | Sig. (2-tailed)     | 0       | 0.005   |         | 0.087   | 0.098   | 0.101  |
|                                                           |                     | N                   | 195     | 191     | 218     | 218     | 218     | 157    |
| GOOGLE RETAIL RECREATION MOBILITY                         | Retail_Mob          | Pearson Correlation | -.376** | -.112*  | 0.116   | 1       | .567**  | 0.041  |
|                                                           |                     | Sig. (2-tailed)     | 0       | 0.047   | 0.087   |         | 0       | 0.561  |
|                                                           |                     | N                   | 330     | 313     | 218     | 353     | 347     | 201    |
| GOOGLE GROCERY PHARMACY MOBILITY                          | Grocery_Mob         | Pearson Correlation | -.293** | -0.021  | 0.112   | .567**  | 1       | 0.067  |
|                                                           |                     | Sig. (2-tailed)     | 0       | 0.717   | 0.098   | 0       |         | 0.348  |
|                                                           |                     | N                   | 331     | 315     | 218     | 347     | 354     | 201    |
| GOOGLE PARKS MOBILITY                                     | Parks_Mob           | Pearson Correlation | .275**  | .332**  | -0.131  | 0.041   | 0.067   | 1      |
|                                                           |                     | Sig. (2-tailed)     | 0       | 0       | 0.101   | 0.561   | 0.348   |        |
|                                                           |                     | N                   | 178     | 176     | 157     | 201     | 201     | 201    |
| GOOGLE TRANSIT MOBILITY                                   | Transit_Mob         | Pearson Correlation | -0.141  | -0.002  | -0.055  | .358**  | .239**  | .167*  |
|                                                           |                     | Sig. (2-tailed)     | 0.062   | 0.984   | 0.492   | 0       | 0.001   | 0.033  |
|                                                           |                     | N                   | 175     | 175     | 160     | 198     | 198     | 164    |
| GOOGLE WORKPLACE MOBILITY                                 | Work_Mob            | Pearson Correlation | -.341** | -0.093  | 0.069   | .664**  | .552**  | 0.054  |
|                                                           |                     | Sig. (2-tailed)     | 0       | 0.097   | 0.312   | 0       | 0       | 0.446  |
|                                                           |                     | N                   | 333     | 317     | 217     | 348     | 351     | 198    |
| GOOGLE RESIDENTIAL MOBILITY                               | Resident_Mob        | Pearson Correlation | -0.055  | 0.049   | 0.063   | -0.026  | -0.08   | -.172* |
|                                                           |                     | Sig. (2-tailed)     | 0.377   | 0.435   | 0.376   | 0.66    | 0.181   | 0.017  |
|                                                           |                     | N                   | 259     | 257     | 202     | 281     | 282     | 192    |
| Percent Has computer with broadband Internet subscription | Computer            | Pearson Correlation | .187**  | -0.005  | -.137*  | -.318** | -.276** | .311** |
|                                                           |                     | Sig. (2-tailed)     | 0       | 0.93    | 0.043   | 0       | 0       | 0      |
|                                                           |                     | N                   | 345     | 324     | 218     | 353     | 354     | 201    |
| Percent BA (Black Alone) MALE                             | BA_Male             | Pearson Correlation | 0.071   | .396**  | -0.018  | .124*   | .176**  | 0.095  |
|                                                           |                     | Sig. (2-tailed)     | 0.195   | 0       | 0.791   | 0.021   | 0.001   | 0.181  |
|                                                           |                     | N                   | 336     | 319     | 213     | 346     | 346     | 199    |
| Percent BA (Black Alone) FEMALE                           | BA_Fem              | Pearson Correlation | .125*   | .449**  | -0.009  | 0.079   | .148**  | .143*  |
|                                                           |                     | Sig. (2-tailed)     | 0.022   | 0       | 0.896   | 0.144   | 0.006   | 0.044  |
|                                                           |                     | N                   | 336     | 319     | 213     | 346     | 346     | 197    |
| Percent AA (Asian Alone) MALE                             | AA_Male             | Pearson Correlation | .666**  | .211**  | -.266** | -.437** | -.328** | 0.036  |
|                                                           |                     | Sig. (2-tailed)     | 0       | 0       | 0       | 0       | 0       | 0.627  |
|                                                           |                     | N                   | 337     | 310     | 198     | 333     | 334     | 181    |
| Percent AA (Asian Alone) FEMALE                           | AA_Fem              | Pearson Correlation | .678**  | .163**  | -.283** | -.419** | -.376** | 0.038  |
|                                                           |                     | Sig. (2-tailed)     | 0       | 0.004   | 0       | 0       | 0       | 0.616  |

|                                                                                                                                                    |                 |                     |         |         |         |         |         |         |
|----------------------------------------------------------------------------------------------------------------------------------------------------|-----------------|---------------------|---------|---------|---------|---------|---------|---------|
|                                                                                                                                                    |                 | N                   | 335     | 308     | 195     | 330     | 331     | 178     |
| Percent NHWA (non-Hispanic White Alone) MALE                                                                                                       | NHWA_Male       | Pearson Correlation | -.432** | -.229** | .147*   | .232**  | .147**  | .352**  |
|                                                                                                                                                    |                 | Sig. (2-tailed)     | 0       | 0       | 0.03    | 0       | 0.006   | 0       |
|                                                                                                                                                    |                 | N                   | 346     | 325     | 218     | 353     | 354     | 201     |
| Percent NHWA (non-Hispanic White Alone) FEMALE                                                                                                     | NHWA_Fem        | Pearson Correlation | -.370** | -.193** | 0.122   | .227**  | .137**  | .402**  |
|                                                                                                                                                    |                 | Sig. (2-tailed)     | 0       | 0       | 0.072   | 0       | 0.01    | 0       |
|                                                                                                                                                    |                 | N                   | 346     | 325     | 218     | 353     | 354     | 201     |
| Percent H (Hispanic) MALE                                                                                                                          | H_Male          | Pearson Correlation | .396**  | .122*   | -.230** | -.396** | -.289** | -.296** |
|                                                                                                                                                    |                 | Sig. (2-tailed)     | 0       | 0.032   | 0.001   | 0       | 0       | 0       |
|                                                                                                                                                    |                 | N                   | 330     | 307     | 201     | 332     | 333     | 181     |
| Percent H (Hispanic) FEMALE                                                                                                                        | H_Female        | Pearson Correlation | .447**  | .146*   | -.227** | -.418** | -.314** | -.268** |
|                                                                                                                                                    |                 | Sig. (2-tailed)     | 0       | 0.01    | 0.001   | 0       | 0       | 0       |
|                                                                                                                                                    |                 | N                   | 330     | 307     | 201     | 332     | 333     | 181     |
| Median Family income; past 2 months 208                                                                                                            | Median_Income   | Pearson Correlation | .554**  | .267**  | -.307** | -.515** | -.450** | .222**  |
|                                                                                                                                                    |                 | Sig. (2-tailed)     | 0       | 0       | 0       | 0       | 0       | 0.002   |
|                                                                                                                                                    |                 | N                   | 341     | 321     | 213     | 348     | 349     | 196     |
| Percent below poverty level Population for whom poverty status is determined                                                                       | Poverty         | Pearson Correlation | -.255** | -0.057  | .192**  | .346**  | .308**  | -.306** |
|                                                                                                                                                    |                 | Sig. (2-tailed)     | 0       | 0.304   | 0.004   | 0       | 0       | 0       |
|                                                                                                                                                    |                 | N                   | 343     | 323     | 218     | 352     | 353     | 201     |
| Percent below poverty level Population for whom poverty status is determined SEX Male                                                              | Poverty_Male    | Pearson Correlation | -.253** | -0.069  | .191**  | .328**  | .292**  | -.305** |
|                                                                                                                                                    |                 | Sig. (2-tailed)     | 0       | 0.218   | 0.005   | 0       | 0       | 0       |
|                                                                                                                                                    |                 | N                   | 344     | 324     | 218     | 353     | 354     | 201     |
| Percent below poverty level Population for whom poverty status is determined SEX Female                                                            | Poverty_Fem     | Pearson Correlation | -.256** | -0.055  | .191**  | .368**  | .323**  | -.303** |
|                                                                                                                                                    |                 | Sig. (2-tailed)     | 0       | 0.325   | 0.005   | 0       | 0       | 0       |
|                                                                                                                                                    |                 | N                   | 344     | 323     | 218     | 352     | 353     | 201     |
| Percent below poverty level Population for whom poverty status is determined RACE AND HISPANIC OR LATINO ORIGIN Black or African American alone    | Poverty_BA      | Pearson Correlation | -.331** | -.214** | .231**  | .229**  | .222**  | -0.101  |
|                                                                                                                                                    |                 | Sig. (2-tailed)     | 0       | 0       | 0.001   | 0       | 0       | 0.155   |
|                                                                                                                                                    |                 | N                   | 345     | 324     | 218     | 353     | 354     | 201     |
| Percent below poverty level Population for whom poverty status is determined RACE AND HISPANIC OR LATINO ORIGIN Asian alone                        | Poverty_AA      | Pearson Correlation | -0.084  | -0.041  | .139*   | 0.002   | 0.038   | -0.076  |
|                                                                                                                                                    |                 | Sig. (2-tailed)     | 0.125   | 0.462   | 0.04    | 0.971   | 0.477   | 0.286   |
|                                                                                                                                                    |                 | N                   | 336     | 319     | 218     | 349     | 350     | 201     |
| Percent below poverty level Pop for whom poverty is determined RACE AND HISPANIC OR LATINO ORIGIN Hispanic or Latino origin of any race            | Poverty_H       | Pearson Correlation | -.123*  | -0.008  | .150*   | .123*   | .105*   | 0.059   |
|                                                                                                                                                    |                 | Sig. (2-tailed)     | 0.023   | 0.887   | 0.027   | 0.021   | 0.048   | 0.405   |
|                                                                                                                                                    |                 | N                   | 342     | 322     | 218     | 351     | 352     | 201     |
| Percent below poverty level Population for whom poverty status is determined RACE AND HISPANIC OR LATINO ORIGIN White alone not Hispanic or Latino | Poverty_NHWA    | Pearson Correlation | -.477** | -.294** | .285**  | .422**  | .367**  | -.268** |
|                                                                                                                                                    |                 | Sig. (2-tailed)     | 0       | 0       | 0       | 0       | 0       | 0       |
|                                                                                                                                                    |                 | N                   | 346     | 325     | 218     | 353     | 354     | 201     |
| Percent below poverty level Population for whom poverty status is determined RACE AND HISPANIC OR LATINO ORIGIN White alone                        | Highschool      | Pearson Correlation | 0.077   | -0.014  | -0.076  | -.310** | -.268** | .426**  |
|                                                                                                                                                    |                 | Sig. (2-tailed)     | 0.155   | 0.804   | 0.268   | 0       | 0       | 0       |
|                                                                                                                                                    |                 | N                   | 344     | 323     | 217     | 352     | 353     | 200     |
| Percent Population 25 years and over Bachelors degree or higher                                                                                    | Bach            | Pearson Correlation | .570**  | .261**  | -.272** | -.603** | -.495** | .238**  |
|                                                                                                                                                    |                 | Sig. (2-tailed)     | 0       | 0       | 0       | 0       | 0       | 0.001   |
|                                                                                                                                                    |                 | N                   | 346     | 325     | 218     | 353     | 354     | 201     |
| Percent RACE AND HISPANIC OR LATINO ORIGIN BY EDUCATIONAL ATTAINMENT White alone not Hispanic or Latino High school graduate or higher             | Highschool_NHWA | Pearson Correlation | .404**  | 0.009   | -.175** | -.593** | -.497** | 0.066   |
|                                                                                                                                                    |                 | Sig. (2-tailed)     | 0       | 0.874   | 0.01    | 0       | 0       | 0.349   |
|                                                                                                                                                    |                 | N                   | 346     | 325     | 218     | 353     | 354     | 201     |
| Percent RACE AND HISPANIC OR LATINO ORIGIN BY EDUCATIONAL ATTAINMENT White alone not Hispanic or Latino Bachelor's degree or higher                | Bach_NHWA       | Pearson Correlation | .638**  | .269**  | -.291** | -.616** | -.494** | 0.086   |
|                                                                                                                                                    |                 | Sig. (2-tailed)     | 0       | 0       | 0       | 0       | 0       | 0.001   |
|                                                                                                                                                    |                 | N                   | 346     | 325     | 218     | 353     | 354     | 201     |

|                                                                                                                                |                |                     |         |         |         |         |         |         |
|--------------------------------------------------------------------------------------------------------------------------------|----------------|---------------------|---------|---------|---------|---------|---------|---------|
| EDUCATIONAL ATTAINMENT White alone not Hispanic or Latino Bachelors degree or higher                                           |                | Sig. (2-tailed)     | 0       | 0       | 0       | 0       | 0       | 0.225   |
|                                                                                                                                |                | N                   | 346     | 325     | 217     | 352     | 353     | 200     |
|                                                                                                                                |                |                     |         |         |         |         |         |         |
| Percent RACE AND HISPANIC OR LATINO ORIGIN BY EDUCATIONAL ATTAINMENT Black alone High school graduate or higher                | Highschool_BA  | Pearson Correlation | .326**  | 0.069   | -.145*  | -.370** | -.257** | 0.099   |
|                                                                                                                                |                | Sig. (2-tailed)     | 0       | 0.214   | 0.033   | 0       | 0       | 0.162   |
|                                                                                                                                |                | N                   | 343     | 323     | 218     | 352     | 353     | 201     |
| Percent RACE AND HISPANIC OR LATINO ORIGIN BY EDUCATIONAL ATTAINMENT Black alone Bachelors degree or higher                    | Bach_BA        | Pearson Correlation | .363**  | .184**  | -.177** | -.376** | -.323** | -0.01   |
|                                                                                                                                |                | Sig. (2-tailed)     | 0       | 0.001   | 0.009   | 0       | 0       | 0.89    |
|                                                                                                                                |                | N                   | 346     | 325     | 218     | 353     | 354     | 201     |
| Percent RACE AND HISPANIC OR LATINO ORIGIN BY EDUCATIONAL ATTAINMENT Asian alone High school graduate or higher                | Highschool_A   | Pearson Correlation | -0.017  | 0.096   | -0.054  | -.125*  | 0.004   | -0.027  |
|                                                                                                                                |                | Sig. (2-tailed)     | 0.751   | 0.088   | 0.43    | 0.02    | 0.945   | 0.702   |
|                                                                                                                                |                | N                   | 333     | 315     | 214     | 344     | 346     | 201     |
| Percent RACE AND HISPANIC OR LATINO ORIGIN BY EDUCATIONAL ATTAINMENT Asian alone Bachelors degree or higher                    | Bach_AA        | Pearson Correlation | .218**  | .131*   | -.223** | -.265** | -.184** | .259**  |
|                                                                                                                                |                | Sig. (2-tailed)     | 0       | 0.019   | 0.001   | 0       | 0.001   | 0       |
|                                                                                                                                |                | N                   | 340     | 320     | 218     | 349     | 351     | 201     |
| Percent RACE AND HISPANIC OR LATINO ORIGIN BY EDUCATIONAL ATTAINMENT Hispanic or Latino Origin High school graduate or higher  | Highschool_H   | Pearson Correlation | -0.039  | -0.031  | 0.01    | -0.06   | -.141** | .310**  |
|                                                                                                                                |                | Sig. (2-tailed)     | 0.472   | 0.581   | 0.88    | 0.262   | 0.008   | 0       |
|                                                                                                                                |                | N                   | 345     | 324     | 218     | 353     | 354     | 201     |
| Percent RACE AND HISPANIC OR LATINO ORIGIN BY EDUCATIONAL ATTAINMENT Hispanic or Latino Origin Bachelors degree or higher      | Bach_H         | Pearson Correlation | .213**  | .135*   | -.163*  | -.191** | -.262** | .328**  |
|                                                                                                                                |                | Sig. (2-tailed)     | 0       | 0.015   | 0.016   | 0       | 0       | 0       |
|                                                                                                                                |                | N                   | 345     | 324     | 218     | 353     | 354     | 201     |
| Percent with a disability Subject Total civilian noninstitutionalized population                                               | Disability     | Pearson Correlation | -.520** | -.163** | .255**  | .462**  | .453**  | -.139*  |
|                                                                                                                                |                | Sig. (2-tailed)     | 0       | 0.003   | 0       | 0       | 0       | 0.049   |
|                                                                                                                                |                | N                   | 346     | 325     | 218     | 353     | 354     | 201     |
| Percent Insured Civilian noninstitutionalized population SEX Male                                                              | Insured_Male   | Pearson Correlation | .210**  | 0.033   | -.179** | -.273** | -.283** | .365**  |
|                                                                                                                                |                | Sig. (2-tailed)     | 0       | 0.553   | 0.008   | 0       | 0       | 0       |
|                                                                                                                                |                | N                   | 345     | 325     | 218     | 353     | 354     | 201     |
| Percent Insured Civilian noninstitutionalized population SEX Female                                                            | Insured_Female | Pearson Correlation | .201**  | -0.001  | -.134*  | -.213** | -.250** | .354**  |
|                                                                                                                                |                | Sig. (2-tailed)     | 0       | 0.992   | 0.049   | 0       | 0       | 0       |
|                                                                                                                                |                | N                   | 344     | 323     | 217     | 351     | 352     | 201     |
| Percent Insured Civilian noninstitutionalized population RACE AND HISPANIC OR LATINO ORIGIN Black or African American alone    | Insured_BA     | Pearson Correlation | .126*   | -0.052  | -.212** | -.159** | -.133*  | -0.025  |
|                                                                                                                                |                | Sig. (2-tailed)     | 0.02    | 0.353   | 0.002   | 0.003   | 0.012   | 0.729   |
|                                                                                                                                |                | N                   | 342     | 321     | 217     | 350     | 351     | 200     |
| Percent Insured Civilian noninstitutionalized population RACE AND HISPANIC OR LATINO ORIGIN Asian alone                        | Insured_AA     | Pearson Correlation | 0.065   | -0.004  | -0.037  | -0.098  | -0.089  | 0.031   |
|                                                                                                                                |                | Sig. (2-tailed)     | 0.243   | 0.943   | 0.593   | 0.073   | 0.105   | 0.662   |
|                                                                                                                                |                | N                   | 324     | 304     | 212     | 336     | 335     | 200     |
| Percent Insured Civilian noninstitutionalized population RACE AND HISPANIC OR LATINO ORIGIN Hispanic or Latino of any race     | Insured_H      | Pearson Correlation | 0.012   | -.176** | 0.028   | -0.036  | -.177** | 0.09    |
|                                                                                                                                |                | Sig. (2-tailed)     | 0.818   | 0.002   | 0.678   | 0.498   | 0.001   | 0.203   |
|                                                                                                                                |                | N                   | 341     | 321     | 217     | 350     | 351     | 201     |
| Percent Insured Civilian noninstitutionalized population RACE AND HISPANIC OR LATINO ORIGIN White alone not Hispanic or Latino | Insured_NHWA   | Pearson Correlation | .446**  | 0.081   | -.301** | -.438** | -.372** | .240**  |
|                                                                                                                                |                | Sig. (2-tailed)     | 0       | 0.146   | 0       | 0       | 0       | 0.001   |
|                                                                                                                                |                | N                   | 345     | 324     | 218     | 352     | 353     | 201     |
| Percent Public Coverage Medicaid means tested public coverage alone or in combination                                          | Medicaid       | Pearson Correlation | -.181** | -.118*  | .183**  | .329**  | .281**  | -.388** |
|                                                                                                                                |                | Sig. (2-tailed)     | 0.001   | 0.033   | 0.007   | 0       | 0       | 0       |
|                                                                                                                                |                | N                   | 346     | 325     | 218     | 353     | 354     | 201     |

\*\* Correlation is significant at the 0.01 level (2-tailed).

\* Correlation is significant at the 0.05 level (2-tailed).

| Transit_Mob | Work_Mob | Resident_Mob | Computer | BA_Male | BA_Female | AA_Male | AA_Female | NHWA_Male | NHWA_Female | H_Male  | H_Female | Median_Income | Poverty | Poverty_Male | Poverty_Female | Poverty_BA |
|-------------|----------|--------------|----------|---------|-----------|---------|-----------|-----------|-------------|---------|----------|---------------|---------|--------------|----------------|------------|
| -0.141      | -.341**  | -0.055       | .187**   | 0.071   | .125*     | .666**  | .678**    | -.432**   | -.370**     | .396**  | .447**   | .554**        | -.255** | -.253**      | -.256**        | -.331**    |
| 0.062       | 0        | 0.377        | 0        | 0.195   | 0.022     | 0       | 0         | 0         | 0           | 0       | 0        | 0             | 0       | 0            | 0              | 0          |
| 175         | 333      | 259          | 345      | 336     | 336       | 337     | 335       | 346       | 346         | 330     | 330      | 341           | 343     | 344          | 344            | 345        |
| -0.002      | -0.093   | 0.049        | -0.005   | .396**  | .449**    | .211**  | .163**    | -.229**   | -.193**     | .122*   | .146*    | .267**        | -0.057  | -0.069       | -0.055         | -.214**    |
| 0.984       | 0.097    | 0.435        | 0.93     | 0       | 0         | 0       | 0.004     | 0         | 0           | 0.032   | 0.01     | 0             | 0.304   | 0.218        | 0.325          | 0          |
| 175         | 317      | 257          | 324      | 319     | 319       | 310     | 308       | 325       | 325         | 307     | 307      | 321           | 323     | 324          | 323            | 324        |
| -0.055      | 0.069    | 0.063        | -.137*   | -0.018  | -0.009    | -.266** | -.283**   | .147*     | 0.122       | -.230** | -.227**  | -.307**       | .192**  | .191**       | .191**         | .231**     |
| 0.492       | 0.312    | 0.376        | 0.043    | 0.791   | 0.896     | 0       | 0         | 0.03      | 0.072       | 0.001   | 0.001    | 0             | 0.004   | 0.005        | 0.005          | 0.001      |
| 160         | 217      | 202          | 218      | 213     | 213       | 198     | 195       | 218       | 218         | 201     | 201      | 213           | 218     | 218          | 218            | 218        |
| .358**      | .664**   | -0.026       | -.318**  | .124*   | 0.079     | -.437** | -.419**   | .232**    | .227**      | -.396** | -.418**  | -.515**       | .346**  | .328**       | .368**         | .229**     |
| 0           | 0        | 0.66         | 0        | 0.021   | 0.144     | 0       | 0         | 0         | 0           | 0       | 0        | 0             | 0       | 0            | 0              | 0          |
| 198         | 348      | 281          | 353      | 346     | 346       | 333     | 330       | 353       | 353         | 332     | 332      | 348           | 352     | 353          | 352            | 353        |
| .239**      | .552**   | -0.08        | -.276**  | .176**  | .148**    | -.328** | -.376**   | .147**    | .137**      | -.289** | -.314**  | -.450**       | .308**  | .292**       | .323**         | .222**     |
| 0.001       | 0        | 0.181        | 0        | 0.001   | 0.006     | 0       | 0         | 0.006     | 0.01        | 0       | 0        | 0             | 0       | 0            | 0              | 0          |
| 198         | 351      | 282          | 354      | 346     | 346       | 334     | 331       | 354       | 354         | 333     | 333      | 349           | 353     | 354          | 353            | 354        |
| .167*       | 0.054    | -.172*       | .311**   | 0.095   | .143*     | 0.036   | 0.038     | .352**    | .402**      | -.296** | -.268**  | .222**        | -.306** | -.305**      | -.303**        | -0.101     |
| 0.033       | 0.446    | 0.017        | 0        | 0.181   | 0.044     | 0.627   | 0.616     | 0         | 0           | 0       | 0        | 0.002         | 0       | 0            | 0              | 0.155      |
| 164         | 198      | 192          | 201      | 199     | 197       | 181     | 178       | 201       | 201         | 181     | 181      | 196           | 201     | 201          | 201            | 201        |
| 1           | .417**   | -.278**      | -0.1     | -0.062  | -0.069    | -.248** | -.215**   | .253**    | .255**      | -.278** | -.279**  | -.298**       | 0.121   | 0.097        | 0.137          | .194**     |
| 0           | 0        | 0.16         | 0.387    | 0.339   | 0.001     | 0.004   | 0         | 0         | 0           | 0       | 0        | 0             | 0.091   | 0.174        | 0.055          | 0.006      |
| 198         | 197      | 189          | 198      | 194     | 193       | 179     | 176       | 198       | 198         | 178     | 178      | 194           | 197     | 198          | 197            | 198        |
| .417**      | 1        | -0.095       | -.282**  | .116*   | 0.052     | -.431** | -.432**   | .216**    | .225**      | -.361** | -.402**  | -.469**       | .314**  | .301**       | .333**         | .197**     |
| 0           | 0.113    | 0            | 0.03     | 0.335   | 0         | 0       | 0         | 0         | 0           | 0       | 0        | 0             | 0       | 0            | 0              | 0          |
| 197         | 356      | 282          | 356      | 348     | 348       | 336     | 333       | 356       | 356         | 335     | 335      | 351           | 355     | 356          | 355            | 356        |
| -.278**     | -0.095   | 1            | 0.038    | -.140*  | -.123*    | 0.054   | 0.066     | -0.018    | -0.021      | 0.107   | 0.11     | .191**        | -.188** | -.185**      | -.188**        | -.211**    |
| 0           | 0.113    | 0.522        | 0.019    | 0.041   | 0.388     | 0.294   | 0.761     | 0.725     | 0.085       | 0.075   | 0.001    | 0.001         | 0.002   | 0.002        | 0.002          | 0          |
| 189         | 282      | 282          | 282      | 280     | 278       | 262     | 259       | 282       | 282         | 262     | 262      | 277           | 282     | 282          | 282            | 282        |
| -0.1        | -.282**  | 0.038        | 1        | -.476** | -.385**   | .145**  | .138*     | .394**    | .458**      | 0.06    | .110*    | .450**        | -.594** | -.586**      | -.612**        | -.118*     |
| 0.16        | 0        | 0.522        | 0        | 0       | 0.007     | 0.01    | 0         | 0         | 0           | 0.265   | 0.04     | 0             | 0       | 0            | 0              | 0.024      |
| 198         | 356      | 282          | 368      | 359     | 359       | 348     | 345       | 368       | 368         | 347     | 347      | 363           | 366     | 367          | 367            | 367        |
| -0.062      | .116*    | -.140*       | -.476**  | 1       | .932**    | 0.07    | 0.031     | -.511**   | -.518**     | 0.017   | -0.002   | -.186**       | .515**  | .479**       | .528**         | -0.019     |
| 0.387       | 0.03     | 0.019        | 0        | 0       | 0.2       | 0.571   | 0         | 0         | 0           | 0.76    | 0.965    | 0             | 0       | 0            | 0              | 0.723      |
| 194         | 348      | 280          | 359      | 359     | 355       | 339     | 336       | 359       | 359         | 338     | 338      | 354           | 359     | 359          | 359            | 358        |
| -0.069      | 0.052    | -.123*       | -.385**  | .932**  | 1         | .134*   | 0.098     | -.554**   | -.529**     | 0.04    | 0.062    | -.123*        | .494**  | .467**       | .502**         | -0.057     |
| 0.339       | 0.335    | 0.041        | 0        | 0       | 0.013     | 0.073   | 0         | 0         | 0           | 0.465   | 0.257    | 0.021         | 0       | 0            | 0              | 0.285      |
| 193         | 348      | 278          | 359      | 355     | 359       | 339     | 336       | 359       | 359         | 338     | 338      | 354           | 359     | 359          | 359            | 358        |
| -.248**     | -.431**  | 0.054        | .145**   | 0.07    | .134*     | 1       | .991**    | -.501**   | -.454**     | .508**  | .547**   | .566**        | -.151** | -.135*       | -.171**        | -.309**    |
| 0.001       | 0        | 0.388        | 0.007    | 0.2     | 0.013     | 0       | 0         | 0         | 0           | 0       | 0        | 0             | 0.005   | 0.012        | 0.001          | 0          |
| 179         | 336      | 262          | 348      | 339     | 339       | 349     | 346       | 349       | 349         | 331     | 331      | 346           | 346     | 347          | 347            | 348        |
| -.215**     | -.432**  | 0.066        | .138*    | 0.031   | 0.098     | .991**  | 1         | -.491**   | -.440**     | .532**  | .576**   | .553**        | -.175** | -.159**      | -.194**        | -.331**    |
| 0.004       | 0        | 0.294        | 0.01     | 0.571   | 0.073     | 0       | 0         | 0         | 0           | 0       | 0        | 0             | 0.001   | 0.003        | 0              | 0          |

|         |         |         |         |         |         |         |         |         |         |         |         |         |         |         |         |         |
|---------|---------|---------|---------|---------|---------|---------|---------|---------|---------|---------|---------|---------|---------|---------|---------|---------|
| 176     | 333     | 259     | 345     | 336     | 336     | 346     | 346     | 346     | 346     | 328     | 328     | 343     | 343     | 344     | 344     | 345     |
| .253**  | .216**  | -0.018  | .394**  | -.511** | -.554** | -.501** | -.491** | 1       | .983**  | -.588** | -.605** | -.119*  | -.299** | -.303** | -.308** | .235**  |
| 0       | 0       | 0.761   | 0       | 0       | 0       | 0       | 0       | 0       | 0       | 0       | 0       | 0.023   | 0       | 0       | 0       | 0       |
| 198     | 356     | 282     | 368     | 359     | 359     | 349     | 346     | 369     | 369     | 348     | 348     | 364     | 366     | 367     | 367     | 368     |
| .255**  | .225**  | -0.021  | .458**  | -.518** | -.529** | -.454** | -.440** | .983**  | 1       | -.580** | -.577** | -0.071  | -.326** | -.333** | -.330** | .198**  |
| 0       | 0       | 0.725   | 0       | 0       | 0       | 0       | 0       | 0       | 0       | 0       | 0       | 0.179   | 0       | 0       | 0       | 0       |
| 198     | 356     | 282     | 368     | 359     | 359     | 349     | 346     | 369     | 369     | 348     | 348     | 364     | 366     | 367     | 367     | 368     |
| -.278** | -.361** | 0.107   | 0.06    | 0.017   | 0.04    | .508**  | .532**  | -.588** | -.580** | 1       | .980**  | .447**  | -.186** | -.165** | -.206** | -.304** |
| 0       | 0       | 0.085   | 0.265   | 0.76    | 0.465   | 0       | 0       | 0       | 0       | 0       | 0       | 0       | 0.001   | 0.002   | 0       | 0       |
| 178     | 335     | 262     | 347     | 338     | 338     | 331     | 328     | 348     | 348     | 348     | 348     | 343     | 345     | 346     | 346     | 347     |
| -.279** | -.402** | 0.11    | .110*   | -0.002  | 0.062   | .547**  | .576**  | -.605** | -.577** | .980**  | 1       | .474**  | -.194** | -.174** | -.213** | -.323** |
| 0       | 0       | 0.075   | 0.04    | 0.965   | 0.257   | 0       | 0       | 0       | 0       | 0       | 0       | 0       | 0       | 0.001   | 0       | 0       |
| 178     | 335     | 262     | 347     | 338     | 338     | 331     | 328     | 348     | 348     | 348     | 348     | 343     | 345     | 346     | 346     | 347     |
| -.298** | -.469** | .191**  | .450**  | -.186** | -.123*  | .566**  | .553**  | -.119*  | -0.071  | .447**  | .474**  | 1       | -.719** | -.699** | -.726** | -.445** |
| 0       | 0       | 0.001   | 0       | 0       | 0.021   | 0       | 0       | 0.023   | 0.179   | 0       | 0       | 0       | 0       | 0       | 0       | 0       |
| 194     | 351     | 277     | 363     | 354     | 354     | 346     | 343     | 364     | 364     | 343     | 343     | 364     | 361     | 362     | 362     | 363     |
| 0.121   | .314**  | -.188** | -.594** | .515**  | .494**  | -.151** | -.175** | -.299** | -.326** | -.186** | -.194** | -.719** | 1       | .984**  | .988**  | .329**  |
| 0.091   | 0       | 0.001   | 0       | 0       | 0       | 0.005   | 0.001   | 0       | 0       | 0.001   | 0       | 0       | 0       | 0       | 0       | 0       |
| 197     | 355     | 282     | 366     | 359     | 359     | 346     | 343     | 366     | 366     | 345     | 345     | 361     | 366     | 366     | 366     | 365     |
| 0.097   | .301**  | -.185** | -.586** | .479**  | .467**  | -.135*  | -.159** | -.303** | -.333** | -.165** | -.174** | -.699** | .984**  | 1       | .945**  | .353**  |
| 0.174   | 0       | 0.002   | 0       | 0       | 0       | 0.012   | 0.003   | 0       | 0       | 0.002   | 0.001   | 0       | 0       | 0       | 0       | 0       |
| 198     | 356     | 282     | 367     | 359     | 359     | 347     | 344     | 367     | 367     | 346     | 346     | 362     | 366     | 367     | 366     | 366     |
| 0.137   | .333**  | -.188** | -.612** | .528**  | .502**  | -.171** | -.194** | -.308** | -.330** | -.206** | -.213** | -.726** | .988**  | .945**  | 1       | .311**  |
| 0.055   | 0       | 0.002   | 0       | 0       | 0       | 0.001   | 0       | 0       | 0       | 0       | 0       | 0       | 0       | 0       | 0       | 0       |
| 197     | 355     | 282     | 367     | 359     | 359     | 347     | 344     | 367     | 367     | 346     | 346     | 362     | 366     | 366     | 367     | 366     |
| .194**  | .197**  | -.211** | -.118*  | -0.019  | -0.057  | -.309** | -.331** | .235**  | .198**  | -.304** | -.323** | -.445** | .329**  | .353**  | .311**  | 1       |
| 0.006   | 0       | 0       | 0.024   | 0.723   | 0.285   | 0       | 0       | 0       | 0       | 0       | 0       | 0       | 0       | 0       | 0       | 0       |
| 198     | 356     | 282     | 367     | 358     | 358     | 348     | 345     | 368     | 368     | 347     | 347     | 363     | 365     | 366     | 366     | 368     |
| 0.058   | 0.069   | -0.097  | 0.051   | 0.012   | 0.052   | 0.019   | 0.012   | -0.001  | -0.003  | -0.033  | -0.036  | -.133*  | .212**  | .197**  | .219**  | 0.078   |
| 0.419   | 0.195   | 0.105   | 0.333   | 0.823   | 0.33    | 0.734   | 0.824   | 0.987   | 0.956   | 0.551   | 0.51    | 0.012   | 0       | 0       | 0       | 0.142   |
| 197     | 352     | 282     | 359     | 352     | 352     | 339     | 336     | 359     | 359     | 338     | 338     | 354     | 359     | 359     | 359     | 358     |
| .255**  | .263**  | -.179** | -.197** | .204**  | .133*   | -.125*  | -.138*  | 0.056   | 0.039   | -.156** | -.167** | -.331** | .437**  | .410**  | .418**  | .223**  |
| 0       | 0       | 0.003   | 0       | 0       | 0.012   | 0.02    | 0.011   | 0.288   | 0.458   | 0.004   | 0.002   | 0       | 0       | 0       | 0       | 0       |
| 198     | 354     | 282     | 365     | 357     | 358     | 345     | 342     | 365     | 365     | 344     | 344     | 360     | 364     | 365     | 364     | 364     |
| .195**  | .358**  | -.137*  | -.395** | .106*   | 0.064   | -.382** | -.388** | .168**  | .120*   | -.350** | -.369** | -.774** | .795**  | .794**  | .773**  | .416**  |
| 0.006   | 0       | 0.021   | 0       | 0.045   | 0.228   | 0       | 0       | 0.001   | 0.021   | 0       | 0       | 0       | 0       | 0       | 0       | 0       |
| 198     | 356     | 282     | 368     | 359     | 359     | 349     | 346     | 369     | 369     | 348     | 348     | 364     | 366     | 367     | 367     | 368     |
| -0.061  | -.296** | 0.079   | .743**  | -.432** | -.424** | 0.027   | 0.029   | .569**  | .594**  | -0.081  | -0.044  | .453**  | -.612** | -.585** | -.632** | -0.042  |
| 0.391   | 0       | 0.189   | 0       | 0       | 0       | 0.615   | 0.594   | 0       | 0       | 0.134   | 0.414   | 0       | 0       | 0       | 0       | 0.422   |
| 197     | 355     | 281     | 367     | 358     | 358     | 347     | 344     | 367     | 367     | 347     | 347     | 362     | 365     | 366     | 366     | 366     |
| -.351** | -.570** | .155**  | .524**  | -.109*  | -0.032  | .653**  | .634**  | -.189** | -.131*  | .400**  | .449**  | .847**  | -.515** | -.481** | -.536** | -.347** |
| 0       | 0       | 0.009   | 0       | 0.039   | 0.551   | 0       | 0       | 0       | 0.012   | 0       | 0       | 0       | 0       | 0       | 0       | 0       |
| 198     | 356     | 282     | 368     | 359     | 359     | 349     | 346     | 369     | 369     | 348     | 348     | 364     | 366     | 367     | 367     | 368     |
| -.277** | -.534** | .123*   | .597**  | -.344** | -.304** | .451**  | .457**  | -0.062  | -0.037  | .369**  | .396**  | .676**  | -.567** | -.532** | -.598** | -.251** |
| 0       | 0       | 0.039   | 0       | 0       | 0       | 0       | 0       | 0.233   | 0.481   | 0       | 0       | 0       | 0       | 0       | 0       | 0       |
| 198     | 356     | 282     | 368     | 359     | 359     | 349     | 346     | 369     | 369     | 348     | 348     | 364     | 366     | 367     | 367     | 368     |
| -.389** | -.594** | .149*   | .369**  | -0.004  | 0.07    | .707**  | .710**  | -.407** | -.360** | .487**  | .531**  | .772**  | -.392** | -.359** | -.414** | -.351** |

|         |         |         |         |         |         |         |         |         |         |         |         |         |         |         |         |         |
|---------|---------|---------|---------|---------|---------|---------|---------|---------|---------|---------|---------|---------|---------|---------|---------|---------|
| 0       | 0       | 0.013   | 0       | 0.936   | 0.184   | 0       | 0       | 0       | 0       | 0       | 0       | 0       | 0       | 0       | 0       | 0       |
| 197     | 355     | 281     | 367     | 358     | 358     | 348     | 346     | 368     | 368     | 347     | 347     | 363     | 365     | 366     | 366     | 367     |
| -.171*  | -.336** | 0.097   | .326**  | -.178** | -.114*  | .331**  | .344**  | -.112*  | -0.076  | .214**  | .267**  | .391**  | -.287** | -.271** | -.301** | -.313** |
| 0.016   | 0       | 0.105   | 0       | 0.001   | 0.032   | 0       | 0       | 0.032   | 0.148   | 0       | 0       | 0       | 0       | 0       | 0       | 0       |
| 198     | 355     | 282     | 365     | 356     | 356     | 346     | 343     | 366     | 366     | 345     | 345     | 361     | 363     | 364     | 364     | 365     |
| -.219** | -.329** | .235**  | .268**  | -.122*  | -0.027  | .466**  | .480**  | -.234** | -.182** | .321**  | .368**  | .538**  | -.279** | -.260** | -.293** | -.395** |
| 0.002   | 0       | 0       | 0       | 0.021   | 0.605   | 0       | 0       | 0       | 0       | 0       | 0       | 0       | 0       | 0       | 0       | 0       |
| 198     | 356     | 282     | 368     | 359     | 359     | 349     | 346     | 369     | 369     | 348     | 348     | 364     | 366     | 367     | 367     | 368     |
| -0.024  | -0.098  | 0.05    | 0.031   | -0.027  | -0.013  | 0.007   | 0.005   | 0.06    | 0.04    | -0.04   | -0.017  | .142**  | -0.097  | -0.08   | -.110*  | -0.021  |
| 0.742   | 0.068   | 0.403   | 0.558   | 0.622   | 0.803   | 0.902   | 0.931   | 0.259   | 0.454   | 0.468   | 0.757   | 0.008   | 0.068   | 0.132   | 0.038   | 0.69    |
| 197     | 347     | 281     | 356     | 349     | 349     | 336     | 333     | 356     | 356     | 335     | 335     | 351     | 356     | 356     | 356     | 355     |
| -.190** | -.170** | .156**  | .229**  | -.107*  | -0.079  | .272**  | .236**  | -0.006  | 0.011   | 0.092   | .120*   | .386**  | -.241** | -.213** | -.275** | -.137** |
| 0.008   | 0.001   | 0.009   | 0       | 0.044   | 0.138   | 0       | 0       | 0.915   | 0.836   | 0.089   | 0.027   | 0       | 0       | 0       | 0       | 0.009   |
| 197     | 352     | 282     | 363     | 355     | 355     | 343     | 340     | 363     | 363     | 342     | 342     | 358     | 362     | 362     | 363     | 362     |
| 0.024   | -.167** | -0.042  | .394**  | -.227** | -.230** | -0.044  | -0.045  | .363**  | .368**  | -.267** | -.225** | .118*   | -.252** | -.249** | -.247** | 0.006   |
| 0.735   | 0.002   | 0.478   | 0       | 0       | 0       | 0.416   | 0.407   | 0       | 0       | 0       | 0       | 0.025   | 0       | 0       | 0       | 0.916   |
| 198     | 356     | 282     | 368     | 359     | 359     | 348     | 345     | 368     | 368     | 347     | 347     | 363     | 366     | 367     | 367     | 367     |
| -0.092  | -.196** | 0.057   | .447**  | -.110*  | -0.034  | .301**  | .276**  | .112*   | .160**  | -0.081  | -0.029  | .441**  | -.292** | -.278** | -.314** | -.204** |
| 0.199   | 0       | 0.336   | 0       | 0.037   | 0.522   | 0       | 0       | 0.032   | 0.002   | 0.134   | 0.585   | 0       | 0       | 0       | 0       | 0       |
| 198     | 356     | 282     | 368     | 359     | 359     | 348     | 345     | 368     | 368     | 347     | 347     | 363     | 366     | 367     | 367     | 367     |
| .282**  | .397**  | -.278** | -.156** | 0.022   | -0.049  | -.559** | -.561** | .396**  | .340**  | -.397** | -.441** | -.668** | .411**  | .389**  | .390**  | .419**  |
| 0       | 0       | 0       | 0.003   | 0.683   | 0.356   | 0       | 0       | 0       | 0       | 0       | 0       | 0       | 0       | 0       | 0       | 0       |
| 198     | 356     | 282     | 368     | 359     | 359     | 349     | 346     | 369     | 369     | 348     | 348     | 364     | 366     | 367     | 367     | 368     |
| 0.014   | -.227** | 0.098   | .621**  | -.458** | -.467** | .173**  | .179**  | .382**  | .408**  | 0.047   | 0.052   | .484**  | -.597** | -.592** | -.597** | -.171** |
| 0.84    | 0       | 0.101   | 0       | 0       | 0       | 0.001   | 0.001   | 0       | 0       | 0.383   | 0.335   | 0       | 0       | 0       | 0       | 0.001   |
| 198     | 356     | 282     | 367     | 359     | 359     | 348     | 345     | 368     | 368     | 347     | 347     | 363     | 366     | 367     | 366     | 367     |
| 0.01    | -.205** | 0.082   | .592**  | -.387** | -.393** | .175**  | .175**  | .315**  | .340**  | 0.036   | 0.036   | .441**  | -.515** | -.485** | -.545** | -.125*  |
| 0.894   | 0       | 0.169   | 0       | 0       | 0       | 0.001   | 0.001   | 0       | 0       | 0.502   | 0.51    | 0       | 0       | 0       | 0       | 0.017   |
| 197     | 354     | 282     | 366     | 358     | 358     | 347     | 344     | 367     | 367     | 346     | 346     | 362     | 365     | 365     | 366     | 366     |
| 0.008   | -.108*  | .135*   | .240**  | -.333** | -.317** | .155**  | .173**  | .111*   | .106*   | .175**  | .165**  | .249**  | -.267** | -.267** | -.300** | -0.04   |
| 0.908   | 0.042   | 0.023   | 0       | 0       | 0       | 0.004   | 0.001   | 0.034   | 0.043   | 0.001   | 0.002   | 0       | 0       | 0       | 0       | 0.451   |
| 198     | 354     | 282     | 364     | 355     | 355     | 345     | 342     | 365     | 365     | 344     | 344     | 360     | 362     | 363     | 363     | 365     |
| 0.036   | -0.004  | .138*   | -0.047  | -0.104  | -.134*  | 0.074   | 0.062   | -0.018  | -0.036  | 0.08    | 0.08    | 0.099   | -0.097  | -0.077  | -0.095  | -0.097  |
| 0.617   | 0.944   | 0.022   | 0.381   | 0.056   | 0.013   | 0.18    | 0.265   | 0.741   | 0.509   | 0.148   | 0.151   | 0.068   | 0.071   | 0.154   | 0.076   | 0.071   |
| 193     | 337     | 275     | 347     | 340     | 340     | 327     | 324     | 347     | 347     | 326     | 326     | 342     | 346     | 346     | 347     | 346     |
| -0.008  | -0.075  | 0.059   | .181**  | -.397** | -.387** | 0.019   | 0.031   | .246**  | .237**  | -0.047  | -0.045  | 0.086   | -.204** | -.194** | -.215** | 0.019   |
| 0.906   | 0.159   | 0.32    | 0.001   | 0       | 0       | 0.725   | 0.566   | 0       | 0       | 0.385   | 0.404   | 0.102   | 0       | 0       | 0       | 0.722   |
| 198     | 352     | 282     | 363     | 355     | 355     | 344     | 341     | 364     | 364     | 343     | 343     | 359     | 362     | 363     | 362     | 363     |
| -.176*  | -.365** | .127*   | .575**  | -.288** | -.281** | .440**  | .451**  | -0.034  | 0.009   | .322**  | .334**  | .647**  | -.589** | -.581** | -.606** | -.317** |
| 0.013   | 0       | 0.033   | 0       | 0       | 0       | 0       | 0       | 0.518   | 0.86    | 0       | 0       | 0       | 0       | 0       | 0       | 0       |
| 198     | 355     | 282     | 367     | 358     | 358     | 348     | 345     | 368     | 368     | 347     | 347     | 363     | 365     | 366     | 366     | 367     |
| 0.094   | .274**  | -.189** | -.542** | .284**  | .284**  | -.141** | -.139** | -.407** | -.428** | -0.024  | -0.039  | -.653** | .769**  | .758**  | .765**  | .240**  |
| 0.188   | 0       | 0.001   | 0       | 0       | 0       | 0.008   | 0.01    | 0       | 0       | 0.658   | 0.468   | 0       | 0       | 0       | 0       | 0       |
| 198     | 356     | 282     | 368     | 359     | 359     | 349     | 346     | 369     | 369     | 348     | 348     | 364     | 366     | 367     | 367     | 368     |

| Poverty_AA | Poverty_H | Poverty_NHWA | Highschool | Bach    | Highschool_NHWA | Bach_NHWA | Highschool_BA | Bach_BA | Highschool_AA | Bach_AA | Highschool_H | Bach_H  | Disability | Insured_Male | Insured_Fem | Insured_BA |
|------------|-----------|--------------|------------|---------|-----------------|-----------|---------------|---------|---------------|---------|--------------|---------|------------|--------------|-------------|------------|
| -0.084     | -.123*    | -.477**      | 0.077      | .570**  | .404**          | .638**    | .326**        | .363**  | -0.017        | .218**  | -0.039       | .213**  | -.520**    | .210**       | .201**      | .126*      |
| 0.125      | 0.023     | 0            | 0.155      | 0       | 0               | 0         | 0             | 0       | 0.751         | 0       | 0.472        | 0       | 0          | 0            | 0           | 0.02       |
| 336        | 342       | 346          | 344        | 346     | 346             | 346       | 343           | 346     | 333           | 340     | 345          | 345     | 346        | 345          | 344         | 342        |
| -0.041     | -0.008    | -.294**      | -0.014     | .261**  | 0.009           | .269**    | 0.069         | .184**  | 0.096         | .131*   | -0.031       | .135*   | -.163**    | 0.033        | -0.001      | -0.052     |
| 0.462      | 0.887     | 0            | 0.804      | 0       | 0.874           | 0         | 0.214         | 0.001   | 0.088         | 0.019   | 0.581        | 0.015   | 0.003      | 0.553        | 0.992       | 0.353      |
| 319        | 322       | 325          | 323        | 325     | 325             | 325       | 323           | 325     | 315           | 320     | 324          | 324     | 325        | 325          | 323         | 321        |
| .139*      | .150*     | .285**       | -0.076     | -.272** | -.175**         | -.291**   | -.145*        | -.177** | -0.054        | -.223** | 0.01         | -.163*  | .255**     | -.179**      | -.134*      | -.212**    |
| 0.04       | 0.027     | 0            | 0.268      | 0       | 0.01            | 0         | 0.033         | 0.009   | 0.43          | 0.001   | 0.88         | 0.016   | 0          | 0.008        | 0.049       | 0.002      |
| 218        | 218       | 218          | 217        | 218     | 218             | 217       | 218           | 218     | 214           | 218     | 218          | 218     | 218        | 218          | 217         | 217        |
| 0.002      | .123*     | .422**       | -.310**    | -.603** | -.593**         | -.616**   | -.370**       | -.376** | -.125*        | -.265** | -0.06        | -.191** | .462**     | -.273**      | -.213**     | -.159**    |
| 0.971      | 0.021     | 0            | 0          | 0       | 0               | 0         | 0             | 0       | 0.02          | 0       | 0.262        | 0       | 0          | 0            | 0           | 0.003      |
| 349        | 351       | 353          | 352        | 353     | 353             | 352       | 352           | 353     | 344           | 349     | 353          | 353     | 353        | 353          | 351         | 350        |
| 0.038      | .105*     | .367**       | -.268**    | -.495** | -.497**         | -.494**   | -.257**       | -.323** | 0.004         | -.184** | -.141**      | -.262** | .453**     | -.283**      | -.250**     | -.133*     |
| 0.477      | 0.048     | 0            | 0          | 0       | 0               | 0         | 0             | 0       | 0.945         | 0.001   | 0.008        | 0       | 0          | 0            | 0           | 0.012      |
| 350        | 352       | 354          | 353        | 354     | 354             | 353       | 353           | 354     | 346           | 351     | 354          | 354     | 354        | 354          | 352         | 351        |
| -0.076     | 0.059     | -.268**      | .426**     | .238**  | 0.066           | 0.086     | 0.099         | -0.01   | -0.027        | .259**  | .310**       | .328**  | -.139*     | .365**       | .354**      | -0.025     |
| 0.286      | 0.405     | 0            | 0          | 0.001   | 0.349           | 0.225     | 0.162         | 0.89    | 0.702         | 0       | 0            | 0       | 0.049      | 0            | 0           | 0.729      |
| 201        | 201       | 201          | 200        | 201     | 201             | 200       | 201           | 201     | 201           | 201     | 201          | 201     | 201        | 201          | 201         | 200        |
| 0.058      | .255**    | .195**       | -0.061     | -.351** | -.277**         | -.389**   | -.171*        | -.219** | -0.024        | -.190** | 0.024        | -0.092  | .282**     | 0.014        | 0.01        | 0.008      |
| 0.419      | 0         | 0.006        | 0.391      | 0       | 0               | 0         | 0.016         | 0.002   | 0.742         | 0.008   | 0.735        | 0.199   | 0          | 0.84         | 0.894       | 0.908      |
| 197        | 198       | 198          | 197        | 198     | 198             | 197       | 198           | 198     | 197           | 197     | 198          | 198     | 198        | 198          | 197         | 198        |
| 0.069      | .263**    | .358**       | -.296**    | -.570** | -.534**         | -.594**   | -.336**       | -.329** | -0.098        | -.170** | -.167**      | -.196** | .397**     | -.227**      | -.205**     | -.108*     |
| 0.195      | 0         | 0            | 0          | 0       | 0               | 0         | 0             | 0       | 0.068         | 0.001   | 0.002        | 0       | 0          | 0            | 0           | 0.042      |
| 352        | 354       | 356          | 355        | 356     | 356             | 355       | 355           | 356     | 347           | 352     | 356          | 356     | 356        | 356          | 354         | 354        |
| -0.097     | -.179**   | -.137*       | 0.079      | .155**  | .123*           | .149*     | 0.097         | .235**  | 0.05          | .156**  | -0.042       | 0.057   | -.278**    | 0.098        | 0.082       | .135*      |
| 0.105      | 0.003     | 0.021        | 0.189      | 0.009   | 0.039           | 0.013     | 0.105         | 0       | 0.403         | 0.009   | 0.478        | 0.336   | 0          | 0.101        | 0.169       | 0.023      |
| 282        | 282       | 282          | 281        | 282     | 282             | 281       | 282           | 282     | 281           | 282     | 282          | 282     | 282        | 282          | 282         | 282        |
| 0.051      | -.197**   | -.395**      | .743**     | .524**  | .597**          | .369**    | .326**        | .268**  | 0.031         | .229**  | .394**       | .447**  | -.156**    | .621**       | .592**      | .240**     |
| 0.333      | 0         | 0            | 0          | 0       | 0               | 0         | 0             | 0       | 0.558         | 0       | 0            | 0       | 0.003      | 0            | 0           | 0          |
| 359        | 365       | 368          | 367        | 368     | 368             | 367       | 365           | 368     | 356           | 363     | 368          | 368     | 368        | 367          | 366         | 364        |
| 0.012      | .204**    | .106*        | -.432**    | -.109*  | -.344**         | -0.004    | -.178**       | -.122*  | -0.027        | -.107*  | -.227**      | -.110*  | 0.022      | -.458**      | -.387**     | -.333**    |
| 0.823      | 0         | 0.045        | 0          | 0.039   | 0               | 0.936     | 0.001         | 0.021   | 0.622         | 0.044   | 0            | 0.037   | 0.683      | 0            | 0           | 0          |
| 352        | 357       | 359          | 358        | 359     | 359             | 358       | 356           | 359     | 349           | 355     | 359          | 359     | 359        | 359          | 358         | 355        |
| 0.052      | .133*     | 0.064        | -.424**    | -0.032  | -.304**         | 0.07      | -.114*        | -0.027  | -0.013        | -0.079  | -.230**      | -0.034  | -0.049     | -.467**      | -.393**     | -.317**    |
| 0.33       | 0.012     | 0.228        | 0          | 0.551   | 0               | 0.184     | 0.032         | 0.605   | 0.803         | 0.138   | 0            | 0.522   | 0.356      | 0            | 0           | 0          |
| 352        | 358       | 359          | 358        | 359     | 359             | 358       | 356           | 359     | 349           | 355     | 359          | 359     | 359        | 359          | 358         | 355        |
| 0.019      | -.125*    | -.382**      | 0.027      | .653**  | .451**          | .707**    | .331**        | .466**  | 0.007         | .272**  | -0.044       | .301**  | -.559**    | .173**       | .175**      | .155**     |
| 0.734      | 0.02      | 0            | 0.615      | 0       | 0               | 0         | 0             | 0       | 0.902         | 0       | 0.416        | 0       | 0          | 0.001        | 0.001       | 0.004      |
| 339        | 345       | 349          | 347        | 349     | 349             | 348       | 346           | 349     | 336           | 343     | 348          | 348     | 349        | 348          | 347         | 345        |
| 0.012      | -.138*    | -.388**      | 0.029      | .634**  | .457**          | .710**    | .344**        | .480**  | 0.005         | .236**  | -0.045       | .276**  | -.561**    | .179**       | .175**      | .173**     |
| 0.824      | 0.011     | 0            | 0.594      | 0       | 0               | 0         | 0             | 0       | 0.931         | 0       | 0.407        | 0       | 0          | 0.001        | 0.001       | 0.001      |

|        |         |         |         |         |         |         |         |         |         |         |         |         |         |         |         |         |
|--------|---------|---------|---------|---------|---------|---------|---------|---------|---------|---------|---------|---------|---------|---------|---------|---------|
| 336    | 342     | 346     | 344     | 346     | 346     | 346     | 343     | 346     | 333     | 340     | 345     | 345     | 346     | 345     | 344     | 342     |
| -0.001 | 0.056   | .168**  | .569**  | -.189** | -0.062  | -.407** | -.112*  | -.234** | 0.06    | -0.006  | .363**  | .112*   | .396**  | .382**  | .315**  | .111*   |
| 0.987  | 0.288   | 0.001   | 0       | 0       | 0.233   | 0       | 0.032   | 0       | 0.259   | 0.915   | 0       | 0.032   | 0       | 0       | 0       | 0.034   |
| 359    | 365     | 369     | 367     | 369     | 369     | 368     | 366     | 369     | 356     | 363     | 368     | 368     | 369     | 368     | 367     | 365     |
| -0.003 | 0.039   | .120*   | .594**  | -.131*  | -0.037  | -.360** | -0.076  | -.182** | 0.04    | 0.011   | .368**  | .160**  | .340**  | .408**  | .340**  | .106*   |
| 0.956  | 0.458   | 0.021   | 0       | 0.012   | 0.481   | 0       | 0.148   | 0       | 0.454   | 0.836   | 0       | 0.002   | 0       | 0       | 0       | 0.043   |
| 359    | 365     | 369     | 367     | 369     | 369     | 368     | 366     | 369     | 356     | 363     | 368     | 368     | 369     | 368     | 367     | 365     |
| -0.033 | -.156** | -.350** | -0.081  | .400**  | .369**  | .487**  | .214**  | .321**  | -0.04   | 0.092   | -.267** | -0.081  | -.397** | 0.047   | 0.036   | .175**  |
| 0.551  | 0.004   | 0       | 0.134   | 0       | 0       | 0       | 0       | 0       | 0.468   | 0.089   | 0       | 0.134   | 0       | 0.383   | 0.502   | 0.001   |
| 338    | 344     | 348     | 347     | 348     | 348     | 347     | 345     | 348     | 335     | 342     | 347     | 347     | 348     | 347     | 346     | 344     |
| -0.036 | -.167** | -.369** | -0.044  | .449**  | .396**  | .531**  | .267**  | .368**  | -0.017  | .120*   | -.225** | -0.029  | -.441** | 0.052   | 0.036   | .165**  |
| 0.51   | 0.002   | 0       | 0.414   | 0       | 0       | 0       | 0       | 0       | 0.757   | 0.027   | 0       | 0.585   | 0       | 0.335   | 0.51    | 0.002   |
| 338    | 344     | 348     | 347     | 348     | 348     | 347     | 345     | 348     | 335     | 342     | 347     | 347     | 348     | 347     | 346     | 344     |
| -.133* | -.331** | -.774** | .453**  | .847**  | .676**  | .772**  | .391**  | .538**  | .142**  | .386**  | .118*   | .441**  | -.668** | .484**  | .441**  | .249**  |
| 0.012  | 0       | 0       | 0       | 0       | 0       | 0       | 0       | 0       | 0.008   | 0       | 0.025   | 0       | 0       | 0       | 0       | 0       |
| 354    | 360     | 364     | 362     | 364     | 364     | 363     | 361     | 364     | 351     | 358     | 363     | 363     | 364     | 363     | 362     | 360     |
| .212** | .437**  | .795**  | -.612** | -.515** | -.567** | -.392** | -.287** | -.279** | -0.097  | -.241** | -.252** | -.292** | .411**  | -.597** | -.515** | -.267** |
| 0      | 0       | 0       | 0       | 0       | 0       | 0       | 0       | 0       | 0.068   | 0       | 0       | 0       | 0       | 0       | 0       | 0       |
| 359    | 364     | 366     | 365     | 366     | 366     | 365     | 363     | 366     | 356     | 362     | 366     | 366     | 366     | 366     | 365     | 362     |
| .197** | .410**  | .794**  | -.585** | -.481** | -.532** | -.359** | -.271** | -.260** | -0.08   | -.213** | -.249** | -.278** | .389**  | -.592** | -.485** | -.267** |
| 0      | 0       | 0       | 0       | 0       | 0       | 0       | 0       | 0       | 0.132   | 0       | 0       | 0       | 0       | 0       | 0       | 0       |
| 359    | 365     | 367     | 366     | 367     | 367     | 366     | 364     | 367     | 356     | 362     | 367     | 367     | 367     | 367     | 365     | 363     |
| .219** | .418**  | .773**  | -.632** | -.536** | -.598** | -.414** | -.301** | -.293** | -.110*  | -.275** | -.247** | -.314** | .390**  | -.597** | -.545** | -.300** |
| 0      | 0       | 0       | 0       | 0       | 0       | 0       | 0       | 0       | 0.038   | 0       | 0       | 0       | 0       | 0       | 0       | 0       |
| 359    | 364     | 367     | 366     | 367     | 367     | 366     | 364     | 367     | 356     | 363     | 367     | 367     | 367     | 366     | 366     | 363     |
| 0.078  | .223**  | .416**  | -0.042  | -.347** | -.251** | -.351** | -.313** | -.395** | -0.021  | -.137** | 0.006   | -.204** | .419**  | -.171** | -.125*  | -0.04   |
| 0.142  | 0       | 0       | 0.422   | 0       | 0       | 0       | 0       | 0       | 0.69    | 0.009   | 0.916   | 0       | 0       | 0.001   | 0.017   | 0.451   |
| 358    | 364     | 368     | 366     | 368     | 368     | 367     | 365     | 368     | 355     | 362     | 367     | 367     | 368     | 367     | 366     | 365     |
| 1      | 0.083   | .197**  | -0.033  | -0.037  | -0.056  | -0.039  | -0.025  | -0.033  | -.167** | -.241** | -0.003  | 0.1     | .112*   | -0.003  | -0.018  | -0.022  |
|        | 0.12    | 0       | 0.529   | 0.487   | 0.294   | 0.459   | 0.642   | 0.533   | 0.002   | 0       | 0.953   | 0.059   | 0.033   | 0.954   | 0.731   | 0.679   |
| 359    | 357     | 359     | 358     | 359     | 359     | 358     | 357     | 359     | 353     | 358     | 359     | 359     | 359     | 359     | 358     | 356     |
| 0.083  | 1       | .338**  | -.182** | -.249** | -.272** | -.228** | -.250** | -.241** | -0.079  | -0.076  | -.180** | -.187** | .258**  | -.134*  | -.119*  | -0.048  |
| 0.12   |         | 0       | 0       | 0       | 0       | 0       | 0       | 0       | 0.136   | 0.151   | 0.001   | 0       | 0       | 0.01    | 0.023   | 0.368   |
| 357    | 365     | 365     | 364     | 365     | 365     | 364     | 362     | 365     | 354     | 360     | 365     | 365     | 365     | 365     | 363     | 361     |
| .197** | .338**  | 1       | -.336** | -.614** | -.580** | -.587** | -.292** | -.345** | -0.034  | -.231** | -0.039  | -.260** | .586**  | -.374** | -.348** | -.162** |
| 0      | 0       |         | 0       | 0       | 0       | 0       | 0       | 0       | 0.524   | 0       | 0.451   | 0       | 0       | 0       | 0       | 0.002   |
| 359    | 365     | 369     | 367     | 369     | 369     | 368     | 366     | 369     | 356     | 363     | 368     | 368     | 369     | 368     | 367     | 365     |
| -0.033 | -.182** | -.336** | 1       | .519**  | .665**  | .326**  | .335**  | .202**  | .123*   | .283**  | .532**  | .476**  | -.171** | .664**  | .609**  | .207**  |
| 0.529  | 0       | 0       |         | 0       | 0       | 0       | 0       | 0       | 0.02    | 0       | 0       | 0       | 0.001   | 0       | 0       | 0       |
| 358    | 364     | 367     | 367     | 367     | 367     | 366     | 364     | 367     | 355     | 362     | 367     | 367     | 367     | 366     | 365     | 363     |
| -0.037 | -.249** | -.614** | .519**  | 1       | .752**  | .948**  | .427**  | .590**  | .165**  | .452**  | .180**  | .570**  | -.692** | .443**  | .413**  | .148**  |
| 0.487  | 0       | 0       | 0       |         | 0       | 0       | 0       | 0       | 0.002   | 0       | 0.001   | 0       | 0       | 0       | 0       | 0.005   |
| 359    | 365     | 369     | 367     | 369     | 369     | 368     | 366     | 369     | 356     | 363     | 368     | 368     | 369     | 368     | 367     | 365     |
| -0.056 | -.272** | -.580** | .665**  | .752**  | 1       | .720**  | .490**  | .436**  | 0.08    | .326**  | .190**  | .387**  | -.547** | .574**  | .545**  | .309**  |
| 0.294  | 0       | 0       | 0       | 0       |         | 0       | 0       | 0       | 0.13    | 0       | 0       | 0       | 0       | 0       | 0       | 0       |
| 359    | 365     | 369     | 367     | 369     | 369     | 368     | 366     | 369     | 356     | 363     | 368     | 368     | 369     | 368     | 367     | 365     |
| -0.039 | -.228** | -.587** | .326**  | .948**  | .720**  | 1       | .412**  | .555**  | .132*   | .394**  | 0.061   | .463**  | -.711** | .298**  | .281**  | .123*   |



|         |         |         |         |         |         |         |         |         |         |         |         |         |         |         |         |        |
|---------|---------|---------|---------|---------|---------|---------|---------|---------|---------|---------|---------|---------|---------|---------|---------|--------|
| 0.459   | 0       | 0       | 0       | 0       | 0       |         | 0       | 0       | 0.013   | 0       | 0.246   | 0       | 0       | 0       | 0       | 0.019  |
| 358     | 364     | 368     | 366     | 368     | 368     | 368     | 365     | 368     | 355     | 362     | 367     | 367     | 368     | 367     | 366     | 364    |
| -0.025  | -.250** | -.292** | .335**  | .427**  | .490**  | .412**  | 1       | .451**  | 0.067   | .228**  | .228**  | .249**  | -.341** | .274**  | .255**  | .168** |
| 0.642   | 0       | 0       | 0       | 0       | 0       | 0       |         | 0       | 0.206   | 0       | 0       | 0       | 0       | 0       | 0       | 0.001  |
| 357     | 362     | 366     | 364     | 366     | 366     | 365     | 366     | 366     | 354     | 361     | 365     | 365     | 366     | 365     | 364     | 362    |
| -0.033  | -.241** | -.345** | .202**  | .590**  | .436**  | .555**  | .451**  | 1       | 0.099   | .288**  | .107*   | .430**  | -.449** | .209**  | .214**  | 0.085  |
| 0.533   | 0       | 0       | 0       | 0       | 0       | 0       | 0       |         | 0.062   | 0       | 0.04    | 0       | 0       | 0       | 0       | 0.106  |
| 359     | 365     | 369     | 367     | 369     | 369     | 368     | 366     | 369     | 356     | 363     | 368     | 368     | 369     | 368     | 367     | 365    |
| -.167** | -0.079  | -0.034  | .123*   | .165**  | 0.08    | .132*   | 0.067   | 0.099   | 1       | .452**  | 0.041   | 0.104   | -0.05   | 0.032   | -0.002  | -0.097 |
| 0.002   | 0.136   | 0.524   | 0.02    | 0.002   | 0.13    | 0.013   | 0.206   | 0.062   |         | 0       | 0.435   | 0.05    | 0.345   | 0.55    | 0.972   | 0.069  |
| 353     | 354     | 356     | 355     | 356     | 356     | 355     | 354     | 356     | 356     | 356     | 356     | 356     | 356     | 356     | 355     | 353    |
| -.241** | -0.076  | -.231** | .283**  | .452**  | .326**  | .394**  | .228**  | .288**  | .452**  | 1       | 0.065   | .314**  | -.363** | .233**  | .245**  | 0.065  |
| 0       | 0.151   | 0       | 0       | 0       | 0       | 0       | 0       | 0       | 0       |         | 0.219   | 0       | 0       | 0       | 0       | 0.22   |
| 358     | 360     | 363     | 362     | 363     | 363     | 362     | 361     | 363     | 356     | 363     | 363     | 363     | 363     | 363     | 362     | 360    |
| -0.003  | -.180** | -0.039  | .532**  | .180**  | .190**  | 0.061   | .228**  | .107*   | 0.041   | 0.065   | 1       | .483**  | 0.038   | .304**  | .307**  | 0.09   |
| 0.953   | 0.001   | 0.451   | 0       | 0.001   | 0       | 0.246   | 0       | 0.04    | 0.435   | 0.219   |         | 0       | 0.462   | 0       | 0       | 0.087  |
| 359     | 365     | 368     | 367     | 368     | 368     | 367     | 365     | 368     | 356     | 363     | 368     | 368     | 368     | 367     | 366     | 364    |
| 0.1     | -.187** | -.260** | .476**  | .570**  | .387**  | .463**  | .249**  | .430**  | 0.104   | .314**  | .483**  | 1       | -.342** | .349**  | .304**  | 0.089  |
| 0.059   | 0       | 0       | 0       | 0       | 0       | 0       | 0       | 0       | 0.05    | 0       | 0       |         | 0       | 0       | 0       | 0.092  |
| 359     | 365     | 368     | 367     | 368     | 368     | 367     | 365     | 368     | 356     | 363     | 368     | 368     | 368     | 367     | 366     | 364    |
| .112*   | .258**  | .586**  | -.171** | -.692** | -.547** | -.711** | -.341** | -.449** | -0.05   | -.363** | 0.038   | -.342** | 1       | -.165** | -.125*  | -0.044 |
| 0.033   | 0       | 0       | 0.001   | 0       | 0       | 0       | 0       | 0       | 0.345   | 0       | 0.462   | 0       |         | 0.002   | 0.017   | 0.398  |
| 359     | 365     | 369     | 367     | 369     | 369     | 368     | 366     | 369     | 356     | 363     | 368     | 368     | 369     | 368     | 367     | 365    |
| -0.003  | -.134*  | -.374** | .664**  | .443**  | .574**  | .298**  | .274**  | .209**  | 0.032   | .233**  | .304**  | .349**  | -.165** | 1       | .909**  | .429** |
| 0.954   | 0.01    | 0       | 0       | 0       | 0       | 0       | 0       | 0       | 0.55    | 0       | 0       | 0       | 0.002   |         | 0       | 0      |
| 359     | 365     | 368     | 366     | 368     | 368     | 367     | 365     | 368     | 356     | 362     | 367     | 367     | 368     | 368     | 366     | 364    |
| -0.018  | -.119*  | -.348** | .609**  | .413**  | .545**  | .281**  | .255**  | .214**  | -0.002  | .245**  | .307**  | .304**  | -.125*  | .909**  | 1       | .378** |
| 0.731   | 0.023   | 0       | 0       | 0       | 0       | 0       | 0       | 0       | 0.972   | 0       | 0       | 0       | 0.017   | 0       |         | 0      |
| 358     | 363     | 367     | 365     | 367     | 367     | 366     | 364     | 367     | 355     | 362     | 366     | 366     | 367     | 366     | 367     | 363    |
| -0.022  | -0.048  | -.162** | .207**  | .148**  | .309**  | .123*   | .168**  | 0.085   | -0.097  | 0.065   | 0.09    | 0.089   | -0.044  | .429**  | .378**  | 1      |
| 0.679   | 0.368   | 0.002   | 0       | 0.005   | 0       | 0.019   | 0.001   | 0.106   | 0.069   | 0.22    | 0.087   | 0.092   | 0.398   | 0       | 0       |        |
| 356     | 361     | 365     | 363     | 365     | 365     | 364     | 362     | 365     | 353     | 360     | 364     | 364     | 365     | 364     | 363     | 365    |
| -.157** | 0.012   | -0.08   | -0.006  | 0.09    | 0.091   | 0.088   | 0.026   | 0.097   | .164**  | .164**  | -.166** | -0.07   | -0.085  | 0.098   | 0.08    | 0.1    |
| 0.004   | 0.825   | 0.136   | 0.911   | 0.094   | 0.089   | 0.101   | 0.625   | 0.071   | 0.002   | 0.002   | 0.002   | 0.193   | 0.113   | 0.067   | 0.138   | 0.064  |
| 343     | 344     | 347     | 346     | 347     | 347     | 346     | 345     | 347     | 339     | 346     | 347     | 347     | 347     | 346     | 347     | 344    |
| -.114*  | -0.02   | -0.004  | .260**  | 0.053   | .188**  | -0.012  | 0.06    | 0.065   | -0.098  | 0.029   | .273**  | 0.103   | 0.035   | .476**  | .533**  | .286** |
| 0.032   | 0.708   | 0.939   | 0       | 0.313   | 0       | 0.813   | 0.258   | 0.214   | 0.067   | 0.586   | 0       | 0.05    | 0.508   | 0       | 0       | 0      |
| 355     | 361     | 364     | 362     | 364     | 364     | 363     | 361     | 364     | 352     | 358     | 363     | 363     | 364     | 364     | 362     | 360    |
| -0.035  | -.224** | -.579** | .490**  | .622**  | .717**  | .573**  | .347**  | .380**  | 0.061   | .298**  | .158**  | .337**  | -.422** | .827**  | .813**  | .393** |
| 0.509   | 0       | 0       | 0       | 0       | 0       | 0       | 0       | 0       | 0.251   | 0       | 0.002   | 0       | 0       | 0       | 0       | 0      |
| 358     | 364     | 368     | 366     | 368     | 368     | 367     | 365     | 368     | 355     | 362     | 367     | 367     | 368     | 367     | 366     | 364    |
| .179**  | .289**  | .610**  | -.706** | -.572** | -.505** | -.404** | -.291** | -.306** | -.188** | -.336** | -.336** | -.456** | .428**  | -.449** | -.364** | -.124* |
| 0.001   | 0       | 0       | 0       | 0       | 0       | 0       | 0       | 0       | 0       | 0       | 0       | 0       | 0       | 0       | 0       | 0.018  |
| 359     | 365     | 369     | 367     | 369     | 369     | 368     | 366     | 369     | 356     | 363     | 368     | 368     | 369     | 368     | 367     | 365    |

| Insured<br>_AA | Insured<br>_H | Insured<br>_NHWA | Medicai<br>d |
|----------------|---------------|------------------|--------------|
| 0.065          | 0.012         | .446**           | -.181**      |
| 0.243          | 0.818         | 0                | 0.001        |
| 324            | 341           | 345              | 346          |
| -0.004         | -.176**       | 0.081            | -.118*       |
| 0.943          | 0.002         | 0.146            | 0.033        |
| 304            | 321           | 324              | 325          |
| -0.037         | 0.028         | -.301**          | .183**       |
| 0.593          | 0.678         | 0                | 0.007        |
| 212            | 217           | 218              | 218          |
| -0.098         | -0.036        | -.438**          | .329**       |
| 0.073          | 0.498         | 0                | 0            |
| 336            | 350           | 352              | 353          |
| -0.089         | -.177**       | -.372**          | .281**       |
| 0.105          | 0.001         | 0                | 0            |
| 335            | 351           | 353              | 354          |
| 0.031          | 0.09          | .240**           | -.388**      |
| 0.662          | 0.203         | 0.001            | 0            |
| 200            | 201           | 201              | 201          |
| 0.036          | -0.008        | -.176*           | 0.094        |
| 0.617          | 0.906         | 0.013            | 0.188        |
| 193            | 198           | 198              | 198          |
| -0.004         | -0.075        | -.365**          | .274**       |
| 0.944          | 0.159         | 0                | 0            |
| 337            | 352           | 355              | 356          |
| .138*          | 0.059         | .127*            | -.189**      |
| 0.022          | 0.32          | 0.033            | 0.001        |
| 275            | 282           | 282              | 282          |
| -0.047         | .181**        | .575**           | -.542**      |
| 0.381          | 0.001         | 0                | 0            |
| 347            | 363           | 367              | 368          |
| -0.104         | -.397**       | -.288**          | .284**       |
| 0.056          | 0             | 0                | 0            |
| 340            | 355           | 358              | 359          |
| -.134*         | -.387**       | -.281**          | .284**       |
| 0.013          | 0             | 0                | 0            |
| 340            | 355           | 358              | 359          |
| 0.074          | 0.019         | .440**           | -.141**      |
| 0.18           | 0.725         | 0                | 0.008        |
| 327            | 344           | 348              | 349          |
| 0.062          | 0.031         | .451**           | -.139**      |
| 0.265          | 0.566         | 0                | 0.01         |

|         |         |         |         |
|---------|---------|---------|---------|
| 324     | 341     | 345     | 346     |
| -0.018  | .246**  | -0.034  | -.407** |
| 0.741   | 0       | 0.518   | 0       |
| 347     | 364     | 368     | 369     |
| -0.036  | .237**  | 0.009   | -.428** |
| 0.509   | 0       | 0.86    | 0       |
| 347     | 364     | 368     | 369     |
| 0.08    | -0.047  | .322**  | -0.024  |
| 0.148   | 0.385   | 0       | 0.658   |
| 326     | 343     | 347     | 348     |
| 0.08    | -0.045  | .334**  | -0.039  |
| 0.151   | 0.404   | 0       | 0.468   |
| 326     | 343     | 347     | 348     |
| 0.099   | 0.086   | .647**  | -.653** |
| 0.068   | 0.102   | 0       | 0       |
| 342     | 359     | 363     | 364     |
| -0.097  | -.204** | -.589** | .769**  |
| 0.071   | 0       | 0       | 0       |
| 346     | 362     | 365     | 366     |
| -0.077  | -.194** | -.581** | .758**  |
| 0.154   | 0       | 0       | 0       |
| 346     | 363     | 366     | 367     |
| -0.095  | -.215** | -.606** | .765**  |
| 0.076   | 0       | 0       | 0       |
| 347     | 362     | 366     | 367     |
| -0.097  | 0.019   | -.317** | .240**  |
| 0.071   | 0.722   | 0       | 0       |
| 346     | 363     | 367     | 368     |
| -.157** | -.114*  | -0.035  | .179**  |
| 0.004   | 0.032   | 0.509   | 0.001   |
| 343     | 355     | 358     | 359     |
| 0.012   | -0.02   | -.224** | .289**  |
| 0.825   | 0.708   | 0       | 0       |
| 344     | 361     | 364     | 365     |
| -0.08   | -0.004  | -.579** | .610**  |
| 0.136   | 0.939   | 0       | 0       |
| 347     | 364     | 368     | 369     |
| -0.006  | .260**  | .490**  | -.706** |
| 0.911   | 0       | 0       | 0       |
| 346     | 362     | 366     | 367     |
| 0.09    | 0.053   | .622**  | -.572** |
| 0.094   | 0.313   | 0       | 0       |
| 347     | 364     | 368     | 369     |
| 0.091   | .188**  | .717**  | -.505** |
| 0.089   | 0       | 0       | 0       |
| 347     | 364     | 368     | 369     |
| 0.088   | -0.012  | .573**  | -.404** |

|         |        |         |         |
|---------|--------|---------|---------|
| 0.101   | 0.813  | 0       | 0       |
| 346     | 363    | 367     | 368     |
| 0.026   | 0.06   | .347**  | -.291** |
| 0.625   | 0.258  | 0       | 0       |
| 345     | 361    | 365     | 366     |
| 0.097   | 0.065  | .380**  | -.306** |
| 0.071   | 0.214  | 0       | 0       |
| 347     | 364    | 368     | 369     |
| .164**  | -0.098 | 0.061   | -.188** |
| 0.002   | 0.067  | 0.251   | 0       |
| 339     | 352    | 355     | 356     |
| .164**  | 0.029  | .298**  | -.336** |
| 0.002   | 0.586  | 0       | 0       |
| 346     | 358    | 362     | 363     |
| -.166** | .273** | .158**  | -.336** |
| 0.002   | 0      | 0.002   | 0       |
| 347     | 363    | 367     | 368     |
| -0.07   | 0.103  | .337**  | -.456** |
| 0.193   | 0.05   | 0       | 0       |
| 347     | 363    | 367     | 368     |
| -0.085  | 0.035  | -.422** | .428**  |
| 0.113   | 0.508  | 0       | 0       |
| 347     | 364    | 368     | 369     |
| 0.098   | .476** | .827**  | -.449** |
| 0.067   | 0      | 0       | 0       |
| 346     | 364    | 367     | 368     |
| 0.08    | .533** | .813**  | -.364** |
| 0.138   | 0      | 0       | 0       |
| 347     | 362    | 366     | 367     |
| 0.1     | .286** | .393**  | -.124*  |
| 0.064   | 0      | 0       | 0.018   |
| 344     | 360    | 364     | 365     |
| 1       | .197** | 0.029   | -0.037  |
|         | 0      | 0.585   | 0.491   |
| 347     | 342    | 346     | 347     |
| .197**  | 1      | .314**  | -0.025  |
| 0       |        | 0       | 0.641   |
| 342     | 364    | 363     | 364     |
| 0.029   | .314** | 1       | -.382** |
| 0.585   | 0      |         | 0       |
| 346     | 363    | 368     | 368     |
| -0.037  | -0.025 | -.382** | 1       |
| 0.491   | 0.641  | 0       |         |
| 347     | 364    | 368     | 369     |
