# Supplementary material
Source: PubMed Central journal article supplement (PMC7462354)
Supplement: 40615_2020_833_MOESM5_ESM.pdf [file 40615_2020_833_MOESM5_ESM.pdf]

**Table S3.** Detailed results of the bivariate analysis of risk factors for infection by COVID-19.

| Risk_factor   | estimate_95CI              | std.err |           |          | BH-FDR   | Full risk factor name                                                                                                              |
|---------------|----------------------------|---------|-----------|----------|----------|------------------------------------------------------------------------------------------------------------------------------------|
|               |                            | or      | statistic | p.value  |          |                                                                                                                                    |
| AA_Fem        | 0.318 ( 0.201 - 0.435 )    | 0.06    | 5.35      | 1.76E-07 | 6.31E-07 | Percent AA (Asian Alone) FEMALE                                                                                                    |
| AA_Male       | 0.317 ( 0.202 - 0.432 )    | 0.06    | 5.43      | 1.13E-07 | 4.52E-07 | Percent AA (Asian Alone) MALE                                                                                                      |
| BA_Fem        | 0.471 ( 0.32 - 0.621 )     | 0.08    | 6.16      | 2.23E-09 | 2.30E-08 | Percent BA (Black Alone) FEMALE                                                                                                    |
| BA_Male       | 0.354 ( 0.204 - 0.505 )    | 0.08    | 4.63      | 5.49E-06 | 1.69E-05 | Percent BA (Black Alone) MALE                                                                                                      |
| Bach          | 0.299 ( 0.191 - 0.408 )    | 0.06    | 5.42      | 1.16E-07 | 4.52E-07 | Percent Population 25 years and over Bachelors degree or higher                                                                    |
| Bach_AA       | 0.137 ( 0.04 - 0.235 )     | 0.05    | 2.78      | 5.69E-03 | 9.78E-03 | Percent RACE AND HISPANIC OR LATINO ORIGIN BY EDUCATIONAL ATTAINMENT Asian alone Bachelors degree or higher                        |
| Bach_BA       | 0.221 ( 0.116 - 0.326 )    | 0.05    | 4.13      | 4.67E-05 | 1.18E-04 | Percent RACE AND HISPANIC OR LATINO ORIGIN BY EDUCATIONAL ATTAINMENT Black alone Bachelors degree or higher                        |
| Bach_H        | 0.115 ( 0.016 - 0.213 )    | 0.05    | 2.29      | 2.27E-02 | 3.25E-02 | Percent RACE AND HISPANIC OR LATINO ORIGIN BY EDUCATIONAL ATTAINMENT Hispanic or Latino Origin Bachelors degree or higher          |
| Bach_NHWA     | 0.344 ( 0.234 - 0.455 )    | 0.06    | 6.13      | 2.67E-09 | 2.30E-08 | Percent RACE AND HISPANIC OR LATINO ORIGIN BY EDUCATIONAL ATTAINMENT White alone not Hispanic or Latino Bachelors degree or higher |
| Computer      | 0.12 ( 0.004 - 0.236 )     | 0.06    | 2.04      | 4.25E-02 | 5.89E-02 | Percent Has computer with broadband Internet subscription                                                                          |
| Death_Rate    | -0.179 ( -0.313 - -0.046 ) | 0.07    | -2.66     | 8.53E-03 | 1.27E-02 | Rate of COVID related Death (percent)                                                                                              |
| Disability    | -0.159 ( -0.265 - -0.053 ) | 0.05    | -2.95     | 3.46E-03 | 6.47E-03 | Percent with a disability Subject Total civilian noninstitutionalized population                                                   |
| Grocery_Mob   | -0.244 ( -0.355 - -0.132 ) | 0.06    | -4.31     | 2.20E-05 | 5.90E-05 | GOOGLE GROCERY PHARMACY MOBILITY                                                                                                   |
| H_Female      | 0.491 ( 0.341 - 0.642 )    | 0.08    | 6.41      | 5.72E-10 | 1.23E-08 | Percent H (Hispanic) FEMALE                                                                                                        |
| H_Male        | 0.463 ( 0.307 - 0.618 )    | 0.08    | 5.85      | 1.32E-08 | 8.10E-08 | Percent H (Hispanic) MALE                                                                                                          |
| Highschool    | 0.076 ( -0.046 - 0.198 )   | 0.06    | 1.23      | 2.21E-01 | 2.57E-01 | Percent below poverty level Population for whom poverty status is determined RACE AND HISPANIC OR LATINO ORIGIN White alone        |
| Highschool_AA | 0.092 ( -0.006 - 0.19 )    | 0.05    | 1.84      | 6.60E-02 | 8.60E-02 | Percent RACE AND HISPANIC OR LATINO ORIGIN BY EDUCATIONAL ATTAINMENT Asian alone High school graduate or higher                    |

|                |                            |      |       |          |          |                                                                                                                                        |
|----------------|----------------------------|------|-------|----------|----------|----------------------------------------------------------------------------------------------------------------------------------------|
| Highschool_BA  | 0.182 ( 0.08 - 0.283 )     | 0.05 | 3.52  | 4.91E-04 | 1.00E-03 | Percent RACE AND HISPANIC OR LATINO ORIGIN BY EDUCATIONAL ATTAINMENT Black alone High school graduate or higher                        |
| Highschool_H   | -0.007 ( -0.108 - 0.093 )  | 0.05 | -0.15 | 8.84E-01 | 8.84E-01 | Percent RACE AND HISPANIC OR LATINO ORIGIN BY EDUCATIONAL ATTAINMENT Hispanic or Latino Origin High school graduate or higher          |
| Highschool_NHW | 0.236 ( 0.116 - 0.355 )    | 0.06 | 3.88  | 1.26E-04 | 2.84E-04 | Percent RACE AND HISPANIC OR LATINO ORIGIN BY EDUCATIONAL ATTAINMENT White alone not Hispanic or Latino High school graduate or higher |
| Insured_AA     | 0.037 ( -0.059 - 0.134 )   | 0.05 | 0.76  | 4.48E-01 | 4.59E-01 | Percent Insured Civilian noninstitutionalized population RACE AND HISPANIC OR LATINO ORIGIN Asian alone                                |
| Insured_BA     | 0.054 ( -0.052 - 0.16 )    | 0.05 | 1.00  | 3.18E-01 | 3.50E-01 | Percent Insured Civilian noninstitutionalized population RACE AND HISPANIC OR LATINO ORIGIN Black or African American alone            |
| Insured_Fem    | 0.104 ( -0.026 - 0.233 )   | 0.07 | 1.58  | 1.15E-01 | 1.42E-01 | Percent Insured Civilian noninstitutionalized population SEX Female                                                                    |
| Insured_H      | -0.099 ( -0.211 - 0.014 )  | 0.06 | -1.73 | 8.54E-02 | 1.08E-01 | Percent Insured Civilian noninstitutionalized population RACE AND HISPANIC OR LATINO ORIGIN Hispanic or Latino of any race             |
| Insured_Male   | 0.181 ( 0.05 - 0.313 )     | 0.07 | 2.71  | 7.09E-03 | 1.17E-02 | Percent Insured Civilian noninstitutionalized population SEX Male                                                                      |
| Insured_NHWA   | 0.251 ( 0.123 - 0.38 )     | 0.07 | 3.85  | 1.42E-04 | 3.05E-04 | Percent Insured Civilian noninstitutionalized population RACE AND HISPANIC OR LATINO ORIGIN White alone not Hispanic or Latino         |
| Median_Income  | 0.364 ( 0.247 - 0.481 )    | 0.06 | 6.14  | 2.49E-09 | 2.30E-08 | Median Family income; past 2 months 208                                                                                                |
| Medicaid       | -0.15 ( -0.261 - -0.04 )   | 0.06 | -2.68 | 7.84E-03 | 1.20E-02 | Percent Public Coverage Medicaid means tested public coverage alone or in combination                                                  |
| NHWA_Fem       | -0.409 ( -0.554 - -0.264 ) | 0.07 | -5.55 | 6.00E-08 | 2.86E-07 | Percent NHWA (non-Hispanic White Alone) FEMALE                                                                                         |
| NHWA_Male      | -0.439 ( -0.584 - -0.295 ) | 0.07 | -5.99 | 5.82E-09 | 4.17E-08 | Percent NHWA (non-Hispanic White Alone) MALE                                                                                           |
| Parks_Mob      | 0.184 ( -0.002 - 0.37 )    | 0.09 | 1.95  | 5.29E-02 | 7.11E-02 | GOOGLE PARKS MOBILITY                                                                                                                  |
| Poverty        | -0.167 ( -0.284 - -0.05 )  | 0.06 | -2.82 | 5.17E-03 | 9.27E-03 | Percent below poverty level Population for whom poverty status is determined                                                           |

|              |                                   |      |       |          |          |                                                                                                                                                    |
|--------------|-----------------------------------|------|-------|----------|----------|----------------------------------------------------------------------------------------------------------------------------------------------------|
| Poverty_AA   | <i>-0.043 ( -0.137 - 0.052 )</i>  | 0.05 | -0.89 | 3.76E-01 | 3.95E-01 | Percent below poverty level Population for whom poverty status is determined RACE AND HISPANIC OR LATINO ORIGIN Asian alone                        |
| Poverty_BA   | <i>-0.213 ( -0.316 - -0.11 )</i>  | 0.05 | -4.06 | 6.28E-05 | 1.50E-04 | Percent below poverty level Population for whom poverty status is determined RACE AND HISPANIC OR LATINO ORIGIN Black or African American alone    |
| Poverty_Fem  | <i>-0.189 ( -0.311 - -0.068 )</i> | 0.06 | -3.06 | 2.37E-03 | 4.64E-03 | Percent below poverty level Population for whom poverty status is determined SEX Female                                                            |
| Poverty_H    | <i>-0.043 ( -0.139 - 0.052 )</i>  | 0.05 | -0.89 | 3.74E-01 | 3.95E-01 | Percent bel poverty Pop for whom poverty is determined RACE AND HISPANIC OR LATINO ORIGIN Hispanic or Latino origin of any race                    |
| Poverty_Male | <i>-0.155 ( -0.268 - -0.042 )</i> | 0.06 | -2.69 | 7.46E-03 | 1.19E-02 | Percent below poverty level Population for whom poverty status is determined SEX Male                                                              |
| Poverty_NHWA | <i>-0.304 ( -0.41 - -0.199 )</i>  | 0.05 | -5.68 | 2.98E-08 | 1.60E-07 | Percent below poverty level Population for whom poverty status is determined RACE AND HISPANIC OR LATINO ORIGIN White alone not Hispanic or Latino |
| Resident_Mob | <i>0.077 ( -0.031 - 0.184 )</i>   | 0.05 | 1.41  | 1.61E-01 | 1.92E-01 | GOOGLE RESIDENTIAL MOBILITY                                                                                                                        |
| Retail_Mob   | <i>-0.259 ( -0.375 - -0.143 )</i> | 0.06 | -4.39 | 1.55E-05 | 4.45E-05 | GOOGLE RETAIL RECREATION MOBILITY                                                                                                                  |
| Total_Pop    | <i>0.341 ( 0.239 - 0.444 )</i>    | 0.05 | 6.55  | 2.53E-10 | 1.09E-08 | TOTAL POPULATION                                                                                                                                   |
| Transit_Mob  | <i>-0.085 ( -0.233 - 0.062 )</i>  | 0.07 | -1.14 | 2.55E-01 | 2.88E-01 | GOOGLE TRANSIT MOBILITY                                                                                                                            |
| Work_Mob     | <i>-0.313 ( -0.431 - -0.196 )</i> | 0.06 | -5.26 | 2.73E-07 | 9.03E-07 | GOOGLE WORKPLACE MOBILITY                                                                                                                          |
