# Supplementary material
Source: PubMed Central journal article supplement (PMC7462354)
Supplement: 40615_2020_833_MOESM7_ESM.pdf [file 40615_2020_833_MOESM7_ESM.pdf]

**Table S5.** Detailed results of the bivariate analysis of risk factors for COVID-19 mortality.

| <b>Risk_factor</b> | <b>estimate_95CI</b>       | <b>std.erro</b> | <b>statistic</b> | <b>p.value</b> | <b>BH-FDR</b> | <b>Full risk factor name</b>                                                                                                           |
|--------------------|----------------------------|-----------------|------------------|----------------|---------------|----------------------------------------------------------------------------------------------------------------------------------------|
| AA_Fem             | -0.267 ( -0.41 - -0.124 )  | 0.07249         | -3.68212         | 3.03E-04       | 2.92E-03      | Percent AA (Asian Alone) FEMALE                                                                                                        |
| AA_Male            | -0.227 ( -0.365 - -0.088 ) | 0.07011         | -3.23117         | 1.45E-03       | 8.93E-03      | Percent AA (Asian Alone) MALE                                                                                                          |
| BA_Fem             | -0.064 ( -0.236 - 0.108 )  | 0.08727         | -0.73266         | 4.65E-01       | 5.12E-01      | Percent BA (Black Alone) FEMALE                                                                                                        |
| BA_Male            | -0.082 ( -0.269 - 0.104 )  | 0.09447         | -0.87184         | 3.84E-01       | 4.35E-01      | Percent BA (Black Alone) MALE                                                                                                          |
| Bach               | -0.246 ( -0.388 - -0.103 ) | 0.07218         | -3.40301         | 7.98E-04       | 5.72E-03      | Percent Population 25 years and over Bachelors degree or higher                                                                        |
| Bach_AA            | -0.233 ( -0.392 - -0.073 ) | 0.08091         | -2.87354         | 4.48E-03       | 1.75E-02      | Percent RACE AND HISPANIC OR LATINO ORIGIN BY EDUCATIONAL ATTAINMENT Asian alone Bachelors degree or higher                            |
| Bach_BA            | -0.155 ( -0.315 - 0.004 )  | 0.08079         | -1.92188         | 5.60E-02       | 9.21E-02      | Percent RACE AND HISPANIC OR LATINO ORIGIN BY EDUCATIONAL ATTAINMENT Black alone Bachelors degree or higher                            |
| Bach_H             | -0.182 ( -0.332 - -0.032 ) | 0.07617         | -2.38512         | 1.80E-02       | 4.29E-02      | Percent RACE AND HISPANIC OR LATINO ORIGIN BY EDUCATIONAL ATTAINMENT Hispanic or Latino Origin Bachelors degree or higher              |
| Bach_NHWA          | -0.263 ( -0.405 - -0.121 ) | 0.07214         | -3.64407         | 3.39E-04       | 2.92E-03      | Percent RACE AND HISPANIC OR LATINO ORIGIN BY EDUCATIONAL ATTAINMENT White alone not Hispanic or Latino Bachelors degree or higher     |
| Computer           | -0.162 ( -0.336 - 0.011 )  | 0.08823         | -1.84114         | 6.70E-02       | 1.03E-01      | Percent Has computer with broadband Internet subscription                                                                              |
| Disability         | 0.27 ( 0.087 - 0.452 )     | 0.09271         | 2.90757          | 4.03E-03       | 1.75E-02      | Percent with a disability Subject Total civilian noninstitutionalized population                                                       |
| Grocery_Mob        | 0.207 ( 0.022 - 0.393 )    | 0.09419         | 2.20177          | 2.88E-02       | 5.89E-02      | GOOGLE GROCERY PHARMACY MOBILITY                                                                                                       |
| H_Female           | -0.21 ( -0.381 - -0.039 )  | 0.08665         | -2.42123         | 1.64E-02       | 4.15E-02      | Percent H (Hispanic) FEMALE                                                                                                            |
| H_Male             | -0.225 ( -0.402 - -0.048 ) | 0.08974         | -2.50567         | 1.31E-02       | 4.01E-02      | Percent H (Hispanic) MALE                                                                                                              |
| Highschool         | -0.134 ( -0.294 - 0.026 )  | 0.08114         | -1.64848         | 1.01E-01       | 1.44E-01      | Percent below poverty level Population for whom poverty status is determined RACE AND HISPANIC OR LATINO ORIGIN White alone            |
| Highschool_A       | -0.037 ( -0.183 - 0.11 )   | 0.07416         | -0.4926          | 6.23E-01       | 6.53E-01      | Percent RACE AND HISPANIC OR LATINO ORIGIN BY EDUCATIONAL ATTAINMENT Asian alone High school graduate or higher                        |
| Highschool_B       | -0.21 ( -0.415 - -0.005 )  | 0.10406         | -2.01943         | 4.47E-02       | 8.36E-02      | Percent RACE AND HISPANIC OR LATINO ORIGIN BY EDUCATIONAL ATTAINMENT Black alone High school graduate or higher                        |
| Highschool_H       | -0.016 ( -0.19 - 0.157 )   | 0.08809         | -0.18597         | 8.53E-01       | 8.53E-01      | Percent RACE AND HISPANIC OR LATINO ORIGIN BY EDUCATIONAL ATTAINMENT Hispanic or Latino Origin High school graduate or higher          |
| Highschool_N       | -0.213 ( -0.384 - -0.042 ) | 0.08691         | -2.44898         | 1.52E-02       | 4.07E-02      | Percent RACE AND HISPANIC OR LATINO ORIGIN BY EDUCATIONAL ATTAINMENT White alone not Hispanic or Latino High school graduate or higher |
| Insured_AA         | -0.029 ( -0.187 - 0.13 )   | 0.08035         | -0.3577          | 7.21E-01       | 7.38E-01      | Percent Insured Civilian noninstitutionalized population RACE AND HISPANIC OR LATINO ORIGIN Asian alone                                |
| Insured_BA         | -0.261 ( -0.454 - -0.068 ) | 0.09784         | -2.66849         | 8.22E-03       | 2.82E-02      | Percent Insured Civilian noninstitutionalized population RACE AND HISPANIC OR LATINO ORIGIN Black or African American alone            |
| Insured_Fem        | -0.224 ( -0.414 - -0.034 ) | 0.09629         | -2.32546         | 2.10E-02       | 4.52E-02      | Percent Insured Civilian noninstitutionalized population SEX Female                                                                    |

|              |                            |         |          |          |          |                                                                                                                                                    |
|--------------|----------------------------|---------|----------|----------|----------|----------------------------------------------------------------------------------------------------------------------------------------------------|
| Insured_H    | 0.103 ( -0.079 - 0.285 )   | 0.0923  | 1.11281  | 2.67E-01 | 3.28E-01 | Percent Insured Civilian noninstitutionalized population RACE AND HISPANIC OR LATINO ORIGIN Hispanic or Latino of any race                         |
| Insured_Male | -0.295 ( -0.483 - -0.106 ) | 0.09545 | -3.08675 | 2.30E-03 | 1.23E-02 | Percent Insured Civilian noninstitutionalized population SEX Male                                                                                  |
| Insured_NHW  | -0.479 ( -0.676 - -0.283 ) | 0.09973 | -4.8056  | 2.94E-06 | 6.00E-05 | Percent Insured Civilian noninstitutionalized population RACE AND HISPANIC OR LATINO ORIGIN White alone not Hispanic or Latino                     |
| Median_Inco  | -0.265 ( -0.408 - -0.122 ) | 0.07271 | -3.64428 | 3.40E-04 | 2.92E-03 | Median Family income; past 2 months 208                                                                                                            |
| Medicaid     | 0.171 ( 0.034 - 0.307 )    | 0.06935 | 2.4622   | 1.46E-02 | 4.07E-02 | Percent Public Coverage Medicaid means tested public coverage alone or in combination                                                              |
| NHWA_Fem     | 0.117 ( -0.051 - 0.285 )   | 0.08524 | 1.37069  | 1.72E-01 | 2.28E-01 | Percent NHWA (non-Hispanic White Alone) FEMALE                                                                                                     |
| NHWA_Male    | 0.143 ( -0.027 - 0.313 )   | 0.08619 | 1.66322  | 9.78E-02 | 1.44E-01 | Percent NHWA (non-Hispanic White Alone) MALE                                                                                                       |
| Parks_Mob    | -0.138 ( -0.324 - 0.047 )  | 0.094   | -1.47177 | 1.43E-01 | 1.99E-01 | GOOGLE PARKS MOBILITY                                                                                                                              |
| Poverty      | 0.148 ( -0.003 - 0.299 )   | 0.07653 | 1.93039  | 5.49E-02 | 9.21E-02 | Percent below poverty level Population for whom poverty status is determined                                                                       |
| Poverty_AA   | 0.107 ( -0.048 - 0.262 )   | 0.07872 | 1.36131  | 1.75E-01 | 2.28E-01 | Percent below poverty level Population for whom poverty status is determined RACE AND HISPANIC OR LATINO ORIGIN Asian alone                        |
| Poverty_BA   | 0.227 ( 0.013 - 0.44 )     | 0.1083  | 2.09467  | 3.74E-02 | 7.31E-02 | Percent below poverty level Population for whom poverty status is determined RACE AND HISPANIC OR LATINO ORIGIN Black or African American alone    |
| Poverty_Fem  | 0.153 ( -0.004 - 0.31 )    | 0.07962 | 1.92299  | 5.58E-02 | 9.21E-02 | Percent below poverty level Population for whom poverty status is determined SEX Female                                                            |
| Poverty_H    | 0.173 ( 0.028 - 0.318 )    | 0.07372 | 2.34495  | 2.00E-02 | 4.52E-02 | Percent bel poverty Pop for whom poverty is determined RACE AND HISPANIC OR LATINO ORIGIN Hispanic or Latino origin of any race                    |
| Poverty_Male | 0.146 ( -0.005 - 0.297 )   | 0.07668 | 1.9073   | 5.79E-02 | 9.21E-02 | Percent below poverty level Population for whom poverty status is determined SEX Male                                                              |
| Poverty_NHW  | 0.231 ( 0.074 - 0.388 )    | 0.07965 | 2.89687  | 4.17E-03 | 1.75E-02 | Percent below poverty level Population for whom poverty status is determined RACE AND HISPANIC OR LATINO ORIGIN White alone not Hispanic or Latino |
| Rate_COV     | -0.207 ( -0.361 - -0.053 ) | 0.07797 | -2.65896 | 8.53E-03 | 2.82E-02 | Rate of COVID in one In Million                                                                                                                    |
| Resident_Mob | 0.064 ( -0.079 - 0.208 )   | 0.07258 | 0.88719  | 3.76E-01 | 4.35E-01 | GOOGLE RESIDENTIAL MOBILITY                                                                                                                        |
| Retail_Mob   | 0.095 ( -0.081 - 0.27 )    | 0.08914 | 1.06067  | 2.90E-01 | 3.47E-01 | GOOGLE RETAIL RECREATION MOBILITY                                                                                                                  |
| Total_Pop    | -0.332 ( -0.466 - -0.198 ) | 0.06799 | -4.88111 | 2.25E-06 | 6.00E-05 | TOTAL POPULATION                                                                                                                                   |
| Transit_Mob  | -0.051 ( -0.204 - 0.102 )  | 0.07737 | -0.66237 | 5.09E-01 | 5.47E-01 | GOOGLE TRANSIT MOBILITY                                                                                                                            |
| Work_Mob     | 0.093 ( -0.06 - 0.246 )    | 0.07779 | 1.19573  | 2.33E-01 | 2.95E-01 | GOOGLE WORKPLACE MOBILITY                                                                                                                          |
