# Supplementary material
Source: PubMed Central journal article supplement (PMC7462354)
Supplement: 40615_2020_833_MOESM8_ESM.pdf [file 40615_2020_833_MOESM8_ESM.pdf]

**Table S6.** Partial correlation model of COVID-19 death with respect to the total population, when controlling for mobility.

| estimate  | p.value     | statistic | n   | Method  | BH-FDR   | (X ~ Y)   Z                         |
|-----------|-------------|-----------|-----|---------|----------|-------------------------------------|
| -0.311243 | 2.35E-05    | -4.34492  | 179 | pearson | 3.52E-05 | (Death_Rate~Total_Pop Resident_Mob) |
| -0.355799 | 3.81E-07    | -5.26155  | 194 | pearson | 2.29E-06 | (Death_Rate~Total_Pop Work_Mob)     |
| -0.333954 | 1.95E-06    | -4.90925  | 195 | pearson | 3.90E-06 | (Death_Rate~Total_Pop Retail_Mob)   |
| -0.202029 | 0.019699691 | -2.36101  | 134 | pearson | 0.0197   | (Death_Rate~Total_Pop Parks_Mob)    |
| -0.336833 | 1.57E-06    | -4.95695  | 195 | pearson | 3.90E-06 | (Death_Rate~Total_Pop Grocery_Mob)  |
| -0.262370 | 0.002030448 | -3.14742  | 137 | pearson | 0.002437 | (Death_Rate~Total_Pop Transit_Mob)  |
| -0.350358 | 5.14E-07    | -5.19670  | 195 | pearson | NA       | (Death_Rate~Total_Pop NA)           |

*Note: Assess the correlation between Death\_Rate and Total\_Pop while controlling for Resident\_Mob using pcor.test(); Controlling for Parks\_Mob appears to have very significant impact on the relationship between Death\_Rate and Total\_Pop. So as Transit\_Mob*

Abbreviations:

|                     |                                       |
|---------------------|---------------------------------------|
| <b>Death_Rate</b>   | Rate of COVID related Death (percent) |
| <b>Total_Pop</b>    | TOTAL POPULATION                      |
| <b>Retail_Mob</b>   | GOOGLE RETAIL RECREATION MOBILITY     |
| <b>Grocery_Mob</b>  | GOOGLE GROCERY PHARMACY MOBILITY      |
| <b>Parks_Mob</b>    | GOOGLE PARKS MOBILITY                 |
| <b>Transit_Mob</b>  | GOOGLE TRANSIT MOBILITY               |
| <b>Work_Mob</b>     | GOOGLE WORKPLACE MOBILITY             |
| <b>Resident_Mob</b> | GOOGLE RESIDENTIAL MOBILITY           |
