# Supplementary material
Source: PubMed Central journal article supplement (PMC7462354)
Supplement: 40615_2020_833_MOESM9_ESM.pdf [file 40615_2020_833_MOESM9_ESM.pdf]

**Table S7.** ANOVA, with comprehensive summary statistics, comparing counties with higher and lower than the median death rate.

|                        | Covariates               | Total |          |                |                             |                             | Group 1: DeathRate ≤ 3.4 |          |                |                             |                             |
|------------------------|--------------------------|-------|----------|----------------|-----------------------------|-----------------------------|--------------------------|----------|----------------|-----------------------------|-----------------------------|
|                        |                          | N     | Mean     | Std. Deviation | 95% CI for Mean/Lo werBound | 95% CI for Mean/Up perBound | N                        | Mean     | Std. Deviation | 95% CI for Mean/Lo werBound | 95% CI for Mean/Up perBound |
| Density                | <b>Population**</b>      | 195   | 2.37E+05 | 2.34E+05       | 2.04E+05                    | 2.70E+05                    | 95                       | 3.20E+05 | 2.46E+05       | 2.70E+05                    | 3.70E+05                    |
|                        | <b>Rate_COV**</b>        | 191   | 1272.57  | 1142.34        | 1109.52                     | 1435.61                     | 99                       | 1433.01  | 1166.21        | 1200.42                     | 1665.61                     |
| Change in mobility     | <b>Retail_Mob**</b>      | 218   | -0.49    | 0.13           | -0.51                       | -0.47                       | 109                      | -0.51    | 0.12           | -0.53                       | -0.49                       |
|                        | Grocery_Mob              | 218   | -0.18    | 0.13           | -0.20                       | -0.16                       | 109                      | -0.19    | 0.14           | -0.22                       | -0.17                       |
|                        | <b>Parks_Mob**</b>       | 157   | 0.13     | 0.60           | 0.03                        | 0.23                        | 96                       | 0.21     | 0.60           | 0.09                        | 0.33                        |
|                        | Transit_Mob              | 160   | -0.50    | 0.16           | -0.52                       | -0.47                       | 97                       | -0.49    | 0.17           | -0.53                       | -0.46                       |
|                        | Work_Mob                 | 217   | -0.38    | 0.08           | -0.39                       | -0.37                       | 109                      | -0.39    | 0.07           | -0.40                       | -0.38                       |
|                        | Resident_Mob             | 202   | 0.15     | 0.05           | 0.14                        | 0.15                        | 107                      | 0.14     | 0.04           | 0.13                        | 0.15                        |
| PC                     | <b>Computer**</b>        | 218   | 29.17    | 3.64           | 28.69                       | 29.66                       | 109                      | 29.89    | 3.06           | 29.31                       | 30.47                       |
| Race                   | BA_Male                  | 213   | 5.68     | 5.42           | 4.95                        | 6.41                        | 108                      | 5.24     | 4.52           | 4.38                        | 6.10                        |
|                        | BA_Fem                   | 213   | 5.76     | 6.01           | 4.94                        | 6.57                        | 108                      | 5.34     | 4.98           | 4.39                        | 6.29                        |
|                        | <b>AA_Male**</b>         | 198   | 1.37     | 1.33           | 1.18                        | 1.56                        | 97                       | 1.69     | 1.36           | 1.41                        | 1.96                        |
|                        | <b>AA_Fem**</b>          | 195   | 1.43     | 1.31           | 1.25                        | 1.62                        | 95                       | 1.76     | 1.35           | 1.49                        | 2.03                        |
|                        | NHWA_Male                | 218   | 33.99    | 10.08          | 32.64                       | 35.33                       | 109                      | 33.55    | 9.38           | 31.77                       | 35.34                       |
|                        | NHWA_Fem                 | 218   | 35.00    | 10.40          | 33.61                       | 36.39                       | 109                      | 34.84    | 9.96           | 32.95                       | 36.73                       |
|                        | <b>H_Male**</b>          | 201   | 4.68     | 4.29           | 4.08                        | 5.27                        | 100                      | 5.43     | 4.53           | 4.53                        | 6.33                        |
|                        | <b>H_Female**</b>        | 201   | 4.48     | 4.27           | 3.88                        | 5.07                        | 100                      | 5.22     | 4.48           | 4.33                        | 6.11                        |
| Income                 | <b>Median_Income**</b>   | 213   | 74817.20 | 18918.79       | 72261.92                    | 77372.47                    | 107                      | 81488.08 | 19201.41       | 77807.85                    | 85168.32                    |
|                        | <b>Poverty**</b>         | 218   | 14.35    | 5.43           | 13.62                       | 15.07                       | 109                      | 12.87    | 4.72           | 11.97                       | 13.76                       |
|                        | <b>Poverty_Male**</b>    | 218   | 13.03    | 5.08           | 12.35                       | 13.71                       | 109                      | 11.66    | 4.36           | 10.84                       | 12.49                       |
|                        | <b>Poverty_Fem**</b>     | 218   | 15.60    | 5.82           | 14.82                       | 16.38                       | 109                      | 14.01    | 5.12           | 13.04                       | 14.98                       |
|                        | <b>Poverty_BA**</b>      | 218   | 27.42    | 11.81          | 25.84                       | 29.00                       | 109                      | 24.46    | 9.80           | 22.60                       | 26.32                       |
|                        | <b>Poverty_AA**</b>      | 218   | 14.15    | 11.29          | 12.64                       | 15.65                       | 109                      | 12.65    | 9.93           | 10.76                       | 14.53                       |
|                        | <b>Poverty_H**</b>       | 218   | 23.55    | 10.23          | 22.19                       | 24.92                       | 109                      | 21.74    | 7.60           | 20.29                       | 23.18                       |
|                        | <b>Poverty_NHWA**</b>    | 218   | 10.51    | 3.92           | 9.99                        | 11.04                       | 109                      | 9.42     | 3.38           | 8.77                        | 10.06                       |
| Education              | <b>Highschool**</b>      | 217   | 87.70    | 5.44           | 86.98                       | 88.43                       | 109                      | 88.50    | 4.83           | 87.59                       | 89.42                       |
|                        | <b>Bach**</b>            | 218   | 28.06    | 11.32          | 26.55                       | 29.57                       | 109                      | 31.31    | 10.97          | 29.23                       | 33.40                       |
|                        | <b>Highschool_NHWA**</b> | 218   | 91.60    | 3.95           | 91.08                       | 92.13                       | 109                      | 92.43    | 3.62           | 91.75                       | 93.12                       |
|                        | <b>Bach_NHWA**</b>       | 217   | 31.31    | 13.13          | 29.56                       | 33.07                       | 109                      | 34.96    | 13.01          | 32.49                       | 37.43                       |
|                        | <b>Highschool_BA**</b>   | 218   | 83.24    | 7.47           | 82.24                       | 84.24                       | 109                      | 85.02    | 6.24           | 83.84                       | 86.21                       |
|                        | <b>Bach_BA**</b>         | 218   | 18.98    | 9.90           | 17.66                       | 20.30                       | 109                      | 20.75    | 9.19           | 19.00                       | 22.49                       |
|                        | <b>Highschool_AA**</b>   | 214   | 85.36    | 9.37           | 84.09                       | 86.62                       | 109                      | 86.68    | 7.79           | 85.20                       | 88.16                       |
|                        | <b>Bach_AA**</b>         | 218   | 47.44    | 18.44          | 44.98                       | 49.90                       | 109                      | 52.27    | 14.74          | 49.47                       | 55.07                       |
|                        | Highschool_H             | 218   | 72.57    | 10.05          | 71.23                       | 73.91                       | 109                      | 72.79    | 8.54           | 71.17                       | 74.41                       |
|                        | <b>Bach_H**</b>          | 218   | 16.82    | 8.00           | 15.75                       | 17.88                       | 109                      | 18.22    | 7.78           | 16.74                       | 19.69                       |
| Disability / Insurance | <b>Disability**</b>      | 218   | 13.59    | 3.06           | 13.18                       | 14.00                       | 109                      | 12.92    | 2.87           | 12.37                       | 13.46                       |
|                        | <b>Insured_Male**</b>    | 218   | 91.75    | 3.15           | 91.33                       | 92.17                       | 109                      | 92.45    | 3.03           | 91.87                       | 93.02                       |
|                        | <b>Insured_Fem**</b>     | 217   | 93.87    | 2.73           | 93.51                       | 94.24                       | 109                      | 94.39    | 2.57           | 93.90                       | 94.87                       |
|                        | <b>Insured_BA**</b>      | 217   | 91.42    | 4.24           | 90.86                       | 91.99                       | 109                      | 92.16    | 3.03           | 91.58                       | 92.73                       |
|                        | Insured_AA               | 212   | 92.14    | 5.51           | 91.39                       | 92.89                       | 109                      | 92.68    | 4.23           | 91.87                       | 93.48                       |
|                        | Insured_H                | 217   | 85.66    | 8.26           | 84.55                       | 86.76                       | 108                      | 86.26    | 7.25           | 84.88                       | 87.65                       |
|                        | <b>Insured_NHWA**</b>    | 218   | 94.50    | 2.43           | 94.18                       | 94.83                       | 109                      | 95.21    | 2.09           | 94.81                       | 95.60                       |
|                        | <b>Medicaid**</b>        | 218   | 22.44    | 7.01           | 21.51                       | 23.38                       | 109                      | 20.88    | 6.36           | 19.68                       | 22.09                       |

| Group 2: DeathRate > 3.4 |          |                |                             |                             | Analysis of Variance (ANOVA) - Between Groups |             |       |            | Covariates        |
|--------------------------|----------|----------------|-----------------------------|-----------------------------|-----------------------------------------------|-------------|-------|------------|-------------------|
| N                        | Mean     | Std. Deviation | 95% CI for Mean/Lo werBound | 95% CI for Mean/Up perBound | Sum of Squares                                | Mean Square | F     | Sig.       |                   |
| 100                      | 1.59E+05 | 1.92E+05       | 1.21E+05                    | 1.97E+05                    | 1.26E+12                                      | 1.26E+12    | 25.97 | ● 8.25E-07 | Population**      |
| 92                       | 1099.91  | 1096.27        | 872.88                      | 1326.94                     | 5291134.12                                    | #####       | 4.12  | ● 4.37E-02 | Rate_COV**        |
| 109                      | -0.47    | 0.14           | -0.50                       | -0.44                       | 0.08                                          | 0.08        | 4.86  | ● 2.86E-02 | Retail_Mob**      |
| 109                      | -0.17    | 0.13           | -0.19                       | -0.14                       | 0.04                                          | 0.04        | 2.23  | ● 1.37E-01 | Grocery_Mob       |
| 61                       | 0.00     | 0.59           | -0.15                       | 0.16                        | 1.59                                          | 1.59        | 4.45  | ● 3.65E-02 | Parks_Mob**       |
| 63                       | -0.50    | 0.16           | -0.54                       | -0.46                       | 0.00                                          | 0.00        | 0.07  | ● 7.98E-01 | Transit_Mob       |
| 108                      | -0.38    | 0.08           | -0.39                       | -0.36                       | 0.01                                          | 0.01        | 2.53  | ● 1.13E-01 | Work_Mob          |
| 95                       | 0.15     | 0.06           | 0.14                        | 0.17                        | 0.01                                          | 0.01        | 3.41  | ● 6.62E-02 | Resident_Mob      |
| 109                      | 28.46    | 4.03           | 27.69                       | 29.22                       | 112.36                                        | 112.36      | 8.78  | ● 3.39E-03 | Computer**        |
| 105                      | 6.14     | 6.21           | 4.93                        | 7.34                        | 42.78                                         | 42.78       | 1.46  | ● 2.29E-01 | BA_Male           |
| 105                      | 6.19     | 6.91           | 4.85                        | 7.52                        | 38.52                                         | 38.52       | 1.07  | ● 3.03E-01 | BA_Fem            |
| 101                      | 1.06     | 1.23           | 0.82                        | 1.31                        | 19.09                                         | 19.09       | 11.31 | ● 9.25E-04 | AA_Male**         |
| 100                      | 1.12     | 1.21           | 0.88                        | 1.36                        | 19.90                                         | 19.90       | 12.18 | ● 5.98E-04 | AA_Fem**          |
| 109                      | 34.42    | 10.76          | 32.38                       | 36.46                       | 40.73                                         | 40.73       | 0.40  | ● 5.28E-01 | NHWA_Male         |
| 109                      | 35.16    | 10.87          | 33.10                       | 37.23                       | 5.76                                          | 5.76        | 0.05  | ● 8.18E-01 | NHWA_Fem          |
| 101                      | 3.92     | 3.92           | 3.15                        | 4.70                        | 114.28                                        | 114.28      | 6.37  | ● 1.24E-02 | H_Male**          |
| 101                      | 3.74     | 3.94           | 2.96                        | 4.51                        | 111.13                                        | 111.13      | 6.25  | ● 1.32E-02 | H_Female**        |
| 106                      | 68083.38 | 16103.69       | 64982.00                    | 71184.76                    | 9.57E+09                                      | 9.57E+09    | 30.45 | ● 1.00E-07 | Median_Income**   |
| 109                      | 15.83    | 5.70           | 14.75                       | 16.91                       | 478.87                                        | 478.87      | 17.49 | ● 4.21E-05 | Poverty**         |
| 109                      | 14.40    | 5.40           | 13.38                       | 15.43                       | 408.45                                        | 408.45      | 16.98 | ● 5.40E-05 | Poverty_Male**    |
| 109                      | 17.19    | 6.07           | 16.04                       | 18.35                       | 551.70                                        | 551.70      | 17.50 | ● 4.18E-05 | Poverty_Fem**     |
| 109                      | 30.38    | 12.91          | 27.93                       | 32.83                       | 1913.70                                       | 1913.70     | 14.57 | ● 1.76E-04 | Poverty_BA**      |
| 109                      | 15.65    | 12.37          | 13.30                       | 18.00                       | 491.10                                        | 491.10      | 3.90  | ● 4.95E-02 | Poverty_AA**      |
| 109                      | 25.37    | 12.08          | 23.07                       | 27.66                       | 718.25                                        | 718.25      | 7.06  | ● 8.49E-03 | Poverty_H**       |
| 109                      | 11.61    | 4.13           | 10.83                       | 12.40                       | 262.46                                        | 262.46      | 18.41 | ● 2.69E-05 | Poverty_NHWA**    |
| 108                      | 86.90    | 5.90           | 85.77                       | 88.02                       | 140.00                                        | 140.00      | 4.82  | ● 2.92E-02 | Highschool**      |
| 109                      | 24.80    | 10.75          | 22.76                       | 26.85                       | 2309.78                                       | 2309.78     | 19.58 | ● 1.53E-05 | Bach**            |
| 109                      | 90.77    | 4.10           | 90.00                       | 91.55                       | 150.11                                        | 150.11      | 10.03 | ● 1.76E-03 | Highschool_NHWA** |
| 108                      | 27.64    | 12.24          | 25.30                       | 29.97                       | 2908.86                                       | 2908.86     | 18.22 | ● 2.95E-05 | Bach_NHWA**       |
| 109                      | 81.46    | 8.17           | 79.90                       | 83.01                       | 694.49                                        | 694.49      | 13.14 | ● 3.60E-04 | Highschool_BA**   |
| 109                      | 17.21    | 10.29          | 15.25                       | 19.16                       | 682.41                                        | 682.41      | 7.17  | ● 8.00E-03 | Bach_BA**         |
| 105                      | 83.98    | 10.64          | 81.92                       | 86.04                       | 391.17                                        | 391.17      | 4.53  | ● 3.45E-02 | Highschool_AA**   |
| 109                      | 42.61    | 20.46          | 38.72                       | 46.49                       | 5094.01                                       | 5094.01     | 16.02 | ● 8.62E-05 | Bach_AA**         |
| 109                      | 72.35    | 11.39          | 70.18                       | 74.51                       | 10.70                                         | 10.70       | 0.11  | ● 7.46E-01 | Highschool_H      |
| 109                      | 15.41    | 8.00           | 13.90                       | 16.93                       | 427.84                                        | 427.84      | 6.87  | ● 9.39E-03 | Bach_H**          |
| 109                      | 14.26    | 3.10           | 13.67                       | 14.85                       | 98.45                                         | 98.45       | 11.01 | ● 1.06E-03 | Disability**      |
| 109                      | 91.05    | 3.13           | 90.46                       | 91.64                       | 106.40                                        | 106.40      | 11.21 | ● 9.59E-04 | Insured_Male**    |
| 108                      | 93.35    | 2.80           | 92.82                       | 93.89                       | 57.73                                         | 57.73       | 7.99  | ● 5.14E-03 | Insured_Fem**     |
| 108                      | 90.69    | 5.10           | 89.71                       | 91.66                       | 117.50                                        | 117.50      | 6.70  | ● 1.03E-02 | Insured_BA**      |
| 103                      | 91.57    | 6.57           | 90.29                       | 92.86                       | 64.47                                         | 64.47       | 2.14  | ● 1.45E-01 | Insured_AA        |
| 109                      | 85.06    | 9.15           | 83.32                       | 86.80                       | 78.91                                         | 78.91       | 1.16  | ● 2.83E-01 | Insured_H         |
| 109                      | 93.80    | 2.55           | 93.32                       | 94.28                       | 107.80                                        | 107.80      | 19.88 | ● 1.33E-05 | Insured_NHWA**    |
| 109                      | 24.00    | 7.30           | 22.61                       | 25.38                       | 529.03                                        | 529.03      | 11.29 | ● 9.23E-04 | Medicaid**        |
