# Supplementary material
Source: PubMed Central journal article supplement (PMC7462354)
Supplement: 40615_2020_833_MOESM10_ESM.pdf [file 40615_2020_833_MOESM10_ESM.pdf]

**Table S8.** Comprehensive data on the number of COVID-19 positive cases and related deaths with respect to race in the United States as of April 16, 2020. H: Hospitalized; D: Death; P: Total population; C: Total COVID cases

| As of 4/16/2020 | TOTAL  |         | African-american/ black |      |   |      | White    |      |   |      | Latino   |       |   |      |
|-----------------|--------|---------|-------------------------|------|---|------|----------|------|---|------|----------|-------|---|------|
|                 | D      | C       | P                       | C    | H | D    | P        | C    | H | D    | P        | C     | H | D    |
| Alabama         | 97     | 4,406   | 1285737                 | 1674 |   | 49   | 3191450  | 2075 |   | 44   | 201970   | 141   |   | 3    |
| Alaska          | 9      | 309     | 22817                   |      |   |      | 448081   |      |   |      | 51712    |       |   |      |
| Arizona         | 169    | 4,507   | 286614                  |      |   | 5    | 3836639  | 900  |   | 69   | 2202173  | 435   |   | 17   |
| Arkansas        | 37     | 1,695   | 458538                  | 491  |   | 14   | 2173307  | 1026 |   | 22   | 223764   |       |   |      |
| California      | 985    | 27,528  | 2164519                 | 1927 |   | 118  | 14616636 | 8258 |   | 364  | 15477306 | 10736 |   | 296  |
| Colorado        | 391    | 9,047   | 216732                  | 649  |   | 29   | 3822055  | 5073 |   | 273  | 1206724  | 2758  |   | 67   |
| Connecticut     | 1,036  | 16,809  | 315817                  | 1654 |   | 156  | 2393694  | 4516 |   | 696  | 578833   | 2137  |   | 89   |
| Delaware        | 61     | 2,323   | 204665                  |      |   |      | 597917   |      |   |      | 89540    |       |   |      |
| D.C.            | 86     | 2,476   | 315281                  | 1171 |   | 66   | 253416   | 461  |   | 10   | 76526    | 403   |   | 8    |
| Florida         | 726    | 24,066  | 3167011                 | 3441 |   | 136  | 11288419 | 6483 |   | 366  | 5370860  | 6684  |   | 150  |
| Georgia         | 668    | 17,432  | 3195363                 | 8363 |   | 347  | 5487048  | 3147 |   | 242  | 1001472  | 828   |   | 22   |
| Hawaii          | 9      | 553     | 24472                   | 5    |   |      | 310584   | 135  |   |      | 150125   |       |   |      |
| Idaho           | 43     | 1,566   | 10739                   |      |   |      | 1407302  |      |   | 41   | 213619   |       |   |      |
| Illinois        | 1,134  | 27,575  | 1796057                 | 6982 |   | 456  | 7834272  | 6939 |   | 444  | 2206927  | 4179  |   | 109  |
| Indiana         | 519    | 10,154  | 610343                  | 1787 |   | 98   | 5278785  | 5087 |   | 345  | 461618   | 406   |   | 9    |
| Iowa            | 64     | 2,332   | 107471                  | 210  |   |      | 2701250  | 1698 |   |      | 185746   | 417   |   |      |
| Kansas          | 84     | 1,705   | 163713                  | 280  |   | 27   | 2210739  | 997  |   | 47   | 345510   | 250   |   | 2    |
| Kentucky        | 137    | 2,522   | 349407                  |      |   |      | 3769995  |      |   |      | 155163   |       |   |      |
| Louisiana       | 1,213  | 20,595  | 1492230                 |      |   | 719  | 2739086  |      |   | 367  | 243620   |       |   | 13   |
| Maine           | 29     | 827     | 16990                   |      |   |      | 1247090  |      |   |      | 21899    |       |   |      |
| Maryland        | 425    | 11,572  | 1759438                 | 4301 |   | 166  | 3066146  | 2681 |   | 137  | 612709   | 1357  |   | 17   |
| Massachusetts   | 1,404  | 34,402  | 463796                  | 2144 |   | 59   | 4906564  | 6537 |   | 414  | 811292   | 3185  |   | 58   |
| Michigan        | 2,227  | 30,023  | 1360345                 | 9908 |   | 891  | 7476534  | 8707 |   | 913  | 504398   | 600   |   | 22   |
| Minnesota       | 111    | 2,071   | 336505                  | 228  |   | 62   | 4455056  | 1325 |   | 82   | 296666   | 124   |   | 3    |
| Mississippi     | 140    | 3,793   | 1121752                 | 2124 |   | 92   | 1688447  | 1365 |   | 48   | 86035    |       |   |      |
| Missouri        | 165    | 5,283   | 699730                  | 1479 |   | 54   | 4854821  | 2008 |   | 69   | 255803   | 211   |   | 7    |
| Montana         | 8      | 422     | 4348                    | 1    |   |      | 906221   | 330  |   |      | 38933    |       |   |      |
| Nebraska        | 24     | 1,138   | 88442                   |      |   |      | 1517634  |      |   |      | 209917   |       |   |      |
| Nevada          | 151    | 3,524   | 249967                  |      |   |      | 1462301  |      |   |      | 864663   |       |   |      |
| New Hampshire   | 37     | 1,287   | 17622                   |      |   |      | 1212790  |      |   |      | 50393    |       |   |      |
| New Jersey      | 3,840  | 78,467  | 1129257                 | 5160 |   | 606  | 4939479  | 8431 |   | 1367 | 1840433  | 6921  |   | 451  |
| New Mexico      | 51     | 1,711   | 38016                   | 47   |   |      | 780688   | 364  |   |      | 1018344  | 413   |   |      |
| New York        | 11,815 | 225,323 | 2808679                 |      |   | 1825 | 10936578 |      |   | 2799 | 3811654  |       |   | 1866 |
| North Carolina  | 152    | 5,859   | 2146254                 | 1769 |   | 52   | 6472902  | 2480 |   | 87   | 962466   | 362   |   | 5    |
| North Dakota    | 9      | 439     | 20113                   |      |   |      | 637291   |      |   |      | 26479    |       |   |      |
| Ohio            | 401    | 8,858   | 1418048                 |      |   |      | 9204374  |      |   |      | 436762   |       |   |      |
| Oklahoma        | 136    | 2,465   | 282622                  | 129  |   |      | 2576937  | 1742 |   |      | 417708   |       |   |      |
| Oregon          | 70     | 1,785   | 74356                   | 31   |   |      | 3132752  | 766  |   |      | 540924   | 340   |   |      |

|                |     |        |         |      |    |          |      |     |          |      |    |
|----------------|-----|--------|---------|------|----|----------|------|-----|----------|------|----|
| Pennsylvania   | 756 | 29,441 | 1360576 | 2497 |    | 9780941  | 4876 |     | 938428   |      |    |
| Rhode Island   | 118 | 4,177  | 59001   |      |    | 763670   |      |     | 163346   |      |    |
| South Carolina | 116 | 4,086  | 1328352 | 1553 | 60 | 3197812  | 2206 | 45  | 285990   | 168  |    |
| South Dakota   | 7   | 1,411  | 15840   |      |    | 715927   |      |     | 31278    |      |    |
| Tennessee      | 142 | 6,589  | 1107218 | 1383 |    | 4962226  | 3195 |     | 361203   | 400  |    |
| Texas          | 451 | 17,849 | 3269253 | 267  |    | 11855092 | 883  |     | 11158751 | 590  |    |
| Utah           | 23  | 2,805  | 33713   | 51   |    | 2428495  | 1475 |     | 434290   | 815  |    |
| Vermont        | 35  | 779    | 7602    |      |    | 578706   |      |     | 11932    |      |    |
| Virginia       | 231 | 7,491  | 1582421 | 1401 |    | 5226540  | 2460 |     | 790662   |      |    |
| Washington     | 603 | 11,445 | 259482  | 436  | 16 | 5077103  | 3619 | 397 | 940792   | 1689 | 38 |
| West Virginia  | 16  | 775    | 65597   | 78   |    | 1670509  | 587  |     | 22807    |      |    |
| Wisconsin      | 205 | 4,045  | 361909  | 984  | 77 | 4706315  | 2081 | 118 | 397847   | 556  | 11 |
| Wyoming        | 2   | 305    | 5149    |      |    | 486586   |      |     | 58122    |      |    |

| Asian   |      |   |     | State          |
|---------|------|---|-----|----------------|
| P       | C    | H | D   |                |
| 1302295 | 44   |   | 3   | Alabama        |
| 21192   |      |   |     | Alaska         |
| 290379  | 76   |   | 3   | Arizona        |
| 455500  | 22   |   |     | Arkansas       |
| 2164239 | 3579 |   | 158 | California     |
| 219500  | 237  |   | 258 | Colorado       |
| 354320  | 204  |   | 14  | Connecticut    |
| 206690  |      |   |     | Delaware       |
| 314705  | 36   |   | 2   | D.C.           |
| 3224452 |      |   |     | Florida        |
| 3245371 | 169  |   | 8   | Georgia        |
| 22629   | 140  |   |     | Hawaii         |
| 10947   |      |   |     | Idaho          |
| 1790512 | 978  |   | 42  | Illinois       |
| 613080  | 81   |   | 2   | Indiana        |
| 103989  | 91   |   |     | Iowa           |
| 161148  | 20   |   | 0   | Kansas         |
| 355829  |      |   |     | Kentucky       |
| 1505991 |      |   | 10  | Louisiana      |
| 15761   |      |   |     | Maine          |
| 1776692 | 252  |   | 13  | Maryland       |
| 477846  | 485  |   | 13  | Massachusetts  |
| 1359264 | 600  |   | 22  | Michigan       |
| 356949  | 104  |   | 1   | Minnesota      |
| 1130323 |      |   |     | Mississippi    |
| 694270  |      |   |     | Missouri       |
| 4380    | 1    |   |     | Montana        |
| 87147   |      |   |     | Nebraska       |
| 265472  |      |   |     | Nevada         |
| 18023   |      |   |     | New Hampshire  |
| 1148321 | 1107 |   | 147 | New Jersey     |
| 38022   | 29   |   |     | New Mexico     |
| 2846481 |      |   | 414 | New York       |
| 2175617 | 80   |   | 1   | North Carolina |
| 22830   |      |   |     | North Dakota   |
| 1421030 |      |   |     | Ohio           |
| 283068  | 48   |   |     | Oklahoma       |
| 74345   | 48   |   |     | Oregon         |

|         |     |    |                |
|---------|-----|----|----------------|
| 1367815 | 253 |    | Pennsylvania   |
| 57196   |     |    | Rhode Island   |
| 1344741 | 82  |    | South Carolina |
| 16345   |     |    | South Dakota   |
| 1115187 | 114 |    | Tennessee      |
| 3330204 | 103 |    | Texas          |
| 35689   | 85  |    | Utah           |
| 7731    |     |    | Vermont        |
| 1595039 |     |    | Virginia       |
| 262211  | 653 | 57 | Washington     |
| 71358   |     |    | West Virginia  |
| 362314  | 108 | 5  | Wisconsin      |
| 5154    |     |    | Wyoming        |
