# Supplementary material
Source: PubMed Central journal article supplement (PMC7462354)
Supplement: 40615_2020_833_MOESM11_ESM.pdf [file 40615_2020_833_MOESM11_ESM.pdf]

**Table S9.** ANOVA, with comprehensive summary statistics, comparing counties with higher and lower than the median percentage of non-Hispanic Whites.

|                     | Covariates   | Total |          |                |                             |                             | Group 1: Percent of NHTA ≤ 39.7 |          |                |                             |                             |
|---------------------|--------------|-------|----------|----------------|-----------------------------|-----------------------------|---------------------------------|----------|----------------|-----------------------------|-----------------------------|
|                     |              | N     | Mean     | Std. Deviation | 95% CI for Mean/Lower Bound | 95% CI for Mean/Upper Bound | N                               | Mean     | Std. Deviation | 95% CI for Mean/Lower Bound | 95% CI for Mean/Upper Bound |
| Density             | Total_Pop    | 346   | 1.55E+05 | 2.03E+05       | 1.34E+05                    | 1.77E+05                    | 160                             | 2.43E+05 | 2.54E+05       | 2.04E+05                    | 2.83E+05                    |
|                     | Rate_COV     | 325   | 912.2    | 1034.3         | 799.3                       | 1025.1                      | 152                             | 1339.1   | 1231.3         | 1141.7                      | 1536.4                      |
|                     | Death_Rate   | 218   | 4.1      | 2.7            | 3.8                         | 4.5                         | 142                             | 3.7      | 2.3            | 3.4                         | 4.1                         |
|                     | Death_Rate_C | 218   | 1.5      | 0.5            | 1.4                         | 1.6                         | 142                             | 1.5      | 0.5            | 1.4                         | 1.5                         |
| Change in mobility  | Retail_Mob   | 353   | -0.5     | 0.1            | -0.5                        | -0.5                        | 176                             | -0.5     | 0.2            | -0.5                        | -0.5                        |
|                     | Grocery_Mob  | 354   | -0.2     | 0.1            | -0.2                        | -0.1                        | 179                             | -0.2     | 0.2            | -0.2                        | -0.1                        |
|                     | Parks_Mob    | 201   | 0.0      | 0.6            | 0.0                         | 0.1                         | 132                             | 0.0      | 0.6            | -0.1                        | 0.1                         |
|                     | Transit_Mob  | 198   | -0.5     | 0.2            | -0.5                        | -0.5                        | 135                             | -0.5     | 0.2            | -0.5                        | -0.5                        |
|                     | Work_Mob     | 356   | -0.4     | 0.1            | -0.4                        | -0.4                        | 179                             | -0.4     | 0.1            | -0.4                        | -0.4                        |
|                     | Resident_Mob | 282   | 0.1      | 0.1            | 0.1                         | 0.1                         | 144                             | 0.1      | 0.0            | 0.1                         | 0.1                         |
| PC                  | Computer     | 368   | 28.8     | 4.0            | 28.4                        | 29.2                        | 182                             | 27.6     | 4.4            | 26.9                        | 28.2                        |
| Race                | BA_Male      | 359   | 4.7      | 5.3            | 4.1                         | 5.2                         | 173                             | 7.7      | 6.0            | 6.8                         | 8.6                         |
|                     | BA_Fem       | 359   | 4.2      | 5.7            | 3.6                         | 4.8                         | 173                             | 7.7      | 6.5            | 6.7                         | 8.7                         |
|                     | AA_Male      | 349   | 1.0      | 1.2            | 0.9                         | 1.1                         | 163                             | 1.6      | 1.4            | 1.4                         | 1.8                         |
|                     | AA_Fem       | 346   | 1.1      | 1.2            | 0.9                         | 1.2                         | 160                             | 1.6      | 1.4            | 1.4                         | 1.9                         |
|                     | NHTA_Male    | 369   | 37.1     | 9.9            | 36.1                        | 38.1                        | 183                             | 29.1     | 8.1            | 27.9                        | 30.2                        |
|                     | NHTA_Fem     | 369   | 37.6     | 10.0           | 36.5                        | 38.6                        | 183                             | 29.7     | 8.5            | 28.5                        | 31.0                        |
|                     | H_Male       | 348   | 3.8      | 3.9            | 3.4                         | 4.2                         | 162                             | 5.9      | 4.7            | 5.1                         | 6.6                         |
|                     | H_Female     | 348   | 3.5      | 3.8            | 3.1                         | 3.9                         | 162                             | 5.5      | 4.6            | 4.8                         | 6.3                         |
| Income              | Median_Incom | 364   | 6.9E+04  | 1.8E+04        | 6.7E+04                     | 7.1E+04                     | 179                             | 7.2E+04  | 2.2E+04        | 6.9E+04                     | 7.6E+04                     |
|                     | Poverty      | 366   | 14.9     | 5.2            | 14.3                        | 15.4                        | 180                             | 16.3     | 6.2            | 15.4                        | 17.2                        |
|                     | Poverty_Fem  | 367   | 16.2     | 5.7            | 15.6                        | 16.8                        | 181                             | 17.8     | 6.8            | 16.8                        | 18.8                        |
|                     | Poverty_Male | 367   | 13.6     | 5.1            | 13.1                        | 14.2                        | 181                             | 14.9     | 5.9            | 14.0                        | 15.8                        |
|                     | Poverty_BA   | 368   | 32.3     | 17.7           | 30.5                        | 34.1                        | 183                             | 28.5     | 12.7           | 26.6                        | 30.3                        |
|                     | Poverty_AA   | 359   | 14.7     | 13.2           | 13.3                        | 16.1                        | 177                             | 15.2     | 12.7           | 13.3                        | 17.1                        |
|                     | Poverty_H    | 365   | 24.0     | 11.0           | 22.9                        | 25.1                        | 179                             | 23.5     | 10.2           | 22.0                        | 25.0                        |
|                     | Poverty_NHTA | 369   | 11.8     | 4.1            | 11.4                        | 12.2                        | 183                             | 11.1     | 4.4            | 10.5                        | 11.8                        |
| Education           | Highschool   | 367   | 87.7     | 5.3            | 87.1                        | 88.2                        | 181                             | 85.4     | 6.1            | 84.5                        | 86.3                        |
|                     | Bach         | 369   | 24.6     | 10.8           | 23.5                        | 25.7                        | 183                             | 27.2     | 12.8           | 25.4                        | 29.1                        |
|                     | Highschool_N | 369   | 90.8     | 4.0            | 90.4                        | 91.2                        | 183                             | 90.9     | 4.8            | 90.2                        | 91.6                        |
|                     | Bach_NHTA    | 368   | 27.0     | 12.4           | 25.8                        | 28.3                        | 182                             | 31.7     | 14.4           | 29.6                        | 33.8                        |
|                     | Highschool_B | 366   | 81.3     | 9.7            | 80.3                        | 82.3                        | 183                             | 82.3     | 8.1            | 81.1                        | 83.4                        |
|                     | Bach_BA      | 369   | 16.2     | 10.9           | 15.1                        | 17.3                        | 183                             | 18.7     | 9.8            | 17.3                        | 20.1                        |
|                     | Highschool_A | 356   | 85.5     | 10.2           | 84.4                        | 86.5                        | 173                             | 85.1     | 9.7            | 83.7                        | 86.6                        |
|                     | Bach_AA      | 363   | 45.4     | 20.8           | 43.2                        | 47.5                        | 178                             | 45.8     | 20.4           | 42.8                        | 48.8                        |
|                     | Highschool_H | 368   | 72.9     | 12.3           | 71.6                        | 74.2                        | 182                             | 69.3     | 12.1           | 67.5                        | 71.1                        |
|                     | Bach_H       | 368   | 15.4     | 9.0            | 14.4                        | 16.3                        | 182                             | 15.1     | 8.9            | 13.8                        | 16.4                        |
| Disability / Insura | Disability   | 369   | 15.0     | 3.6            | 14.6                        | 15.4                        | 183                             | 13.8     | 3.6            | 13.3                        | 14.3                        |
|                     | Insured_Male | 368   | 91.5     | 3.2            | 91.2                        | 91.9                        | 182                             | 90.6     | 3.5            | 90.1                        | 91.1                        |
|                     | Insured_Fem  | 367   | 93.7     | 2.8            | 93.4                        | 94.0                        | 181                             | 92.9     | 3.0            | 92.5                        | 93.3                        |
|                     | Insured_BA   | 365   | 91.6     | 5.4            | 91.1                        | 92.2                        | 180                             | 91.1     | 4.6            | 90.4                        | 91.7                        |
|                     | Insured_AA   | 347   | 92.4     | 6.5            | 91.8                        | 93.1                        | 171                             | 92.6     | 5.9            | 91.8                        | 93.5                        |
|                     | Insured_H    | 364   | 86.6     | 8.8            | 85.7                        | 87.5                        | 181                             | 84.2     | 9.4            | 82.8                        | 85.6                        |
|                     | Insured_NHTA | 368   | 93.9     | 2.6            | 93.6                        | 94.2                        | 183                             | 93.9     | 2.9            | 93.5                        | 94.3                        |
|                     | Medicaid     | 369   | 23.2     | 6.6            | 22.5                        | 23.9                        | 183                             | 25.0     | 7.9            | 23.8                        | 26.1                        |

| Group 2: Percent of NHWA > 39.7 |          |                |                             |                             | Analysis of Variance (ANOVA) - Between Groups |             |       |         |  |
|---------------------------------|----------|----------------|-----------------------------|-----------------------------|-----------------------------------------------|-------------|-------|---------|--|
| N                               | Mean     | Std. Deviation | 95% CI for Mean/Lower Bound | 95% CI for Mean/Upper Bound | Sum of Squares                                | Mean Square | F     | Sig.    |  |
| 186                             | 7.93E+04 | 9.41E+04       | 6.57E+04                    | 9.29E+04                    | 2.31E+12                                      | 2.31E+12    | 67.0  | 5.3E-15 |  |
| 173                             | 537.2    | 617.6          | 444.5                       | 629.8                       | 5.20E+07                                      | 5.20E+07    | 57.1  | 4.4E-13 |  |
| 76                              | 4.9      | 3.2            | 4.1                         | 5.6                         | 60.5                                          | 60.5        | 8.6   | 3.8E-03 |  |
| 76                              | 1.6      | 0.5            | 1.5                         | 1.7                         | 0.7                                           | 0.7         | 2.9   | 8.9E-02 |  |
| 177                             | -0.4     | 0.1            | -0.5                        | -0.4                        | 0.2                                           | 0.2         | 11.3  | 8.4E-04 |  |
| 175                             | -0.1     | 0.1            | -0.2                        | -0.1                        | 0.1                                           | 0.1         | 3.5   | 6.3E-02 |  |
| 69                              | 0.1      | 0.5            | 0.0                         | 0.2                         | 0.4                                           | 0.4         | 1.2   | 2.8E-01 |  |
| 63                              | -0.4     | 0.2            | -0.5                        | -0.4                        | 0.2                                           | 0.2         | 8.4   | 4.2E-03 |  |
| 177                             | -0.4     | 0.1            | -0.4                        | -0.3                        | 0.1                                           | 0.1         | 10.9  | 1.1E-03 |  |
| 138                             | 0.1      | 0.1            | 0.1                         | 0.2                         | 0.0                                           | 0.0         | 0.3   | 6.0E-01 |  |
| 186                             | 30.0     | 3.1            | 29.6                        | 30.5                        | 557.3                                         | 557.3       | 38.4  | 1.5E-09 |  |
| 186                             | 1.9      | 2.3            | 1.6                         | 2.2                         | 2983.7                                        | 2983.7      | 148.8 | 7.5E-29 |  |
| 186                             | 1.0      | 1.1            | 0.8                         | 1.2                         | 4051.6                                        | 4051.6      | 191.9 | 3.2E-35 |  |
| 186                             | 0.5      | 0.5            | 0.4                         | 0.5                         | 112.1                                         | 112.1       | 103.1 | 2.2E-21 |  |
| 186                             | 0.6      | 0.5            | 0.5                         | 0.6                         | 102.7                                         | 102.7       | 96.0  | 3.8E-20 |  |
| 186                             | 44.9     | 2.6            | 44.6                        | 45.3                        | 23207.3                                       | 23207.3     | 653.4 | 1.7E-83 |  |
| 186                             | 45.3     | 2.8            | 44.9                        | 45.7                        | 22298.4                                       | 22298.4     | 561.5 | 5.7E-76 |  |
| 186                             | 2.1      | 1.6            | 1.8                         | 2.3                         | 1254.1                                        | 1254.1      | 105.9 | 7.6E-22 |  |
| 186                             | 1.8      | 1.4            | 1.5                         | 2.0                         | 1238.4                                        | 1238.4      | 112.0 | 7.3E-23 |  |
| 185                             | 6.6E+04  | 1.1E+04        | 6.4E+04                     | 6.7E+04                     | 4.3E+09                                       | 4.3E+09     | 14.4  | 1.7E-04 |  |
| 186                             | 13.6     | 3.7            | 13.0                        | 14.1                        | 673.8                                         | 673.8       | 26.2  | 5.0E-07 |  |
| 186                             | 14.7     | 3.8            | 14.1                        | 15.2                        | 888.6                                         | 888.6       | 29.1  | 1.2E-07 |  |
| 186                             | 12.4     | 3.8            | 11.9                        | 13.0                        | 564.2                                         | 564.2       | 23.3  | 2.1E-06 |  |
| 185                             | 36.1     | 20.9           | 33.1                        | 39.1                        | 5327.7                                        | 5327.7      | 17.8  | 3.2E-05 |  |
| 182                             | 14.2     | 13.6           | 12.2                        | 16.2                        | 90.9                                          | 90.9        | 0.5   | 4.7E-01 |  |
| 186                             | 24.4     | 11.8           | 22.7                        | 26.2                        | 74.1                                          | 74.1        | 0.6   | 4.4E-01 |  |
| 186                             | 12.5     | 3.7            | 12.0                        | 13.0                        | 173.1                                         | 173.1       | 10.6  | 1.2E-03 |  |
| 186                             | 89.8     | 3.2            | 89.4                        | 90.3                        | 1760.7                                        | 1760.7      | 75.2  | 1.4E-16 |  |
| 186                             | 22.1     | 7.6            | 21.0                        | 23.2                        | 2455.8                                        | 2455.8      | 22.4  | 3.2E-06 |  |
| 186                             | 90.6     | 3.1            | 90.2                        | 91.1                        | 8.1                                           | 8.1         | 0.5   | 4.8E-01 |  |
| 186                             | 22.5     | 7.6            | 21.4                        | 23.6                        | 7897.4                                        | 7897.4      | 60.1  | 8.9E-14 |  |
| 183                             | 80.3     | 11.1           | 78.7                        | 82.0                        | 336.0                                         | 336.0       | 3.6   | 6.0E-02 |  |
| 186                             | 13.8     | 11.5           | 12.1                        | 15.4                        | 2276.2                                        | 2276.2      | 20.1  | 9.9E-06 |  |
| 183                             | 85.8     | 10.7           | 84.3                        | 87.4                        | 42.1                                          | 42.1        | 0.4   | 5.3E-01 |  |
| 185                             | 44.9     | 21.2           | 41.8                        | 48.0                        | 73.8                                          | 73.8        | 0.2   | 6.8E-01 |  |
| 186                             | 76.4     | 11.5           | 74.8                        | 78.1                        | 4679.4                                        | 4679.4      | 33.7  | 1.4E-08 |  |
| 186                             | 15.7     | 9.1            | 14.3                        | 17.0                        | 31.7                                          | 31.7        | 0.4   | 5.3E-01 |  |
| 186                             | 16.2     | 3.3            | 15.7                        | 16.6                        | 526.0                                         | 526.0       | 44.6  | 9.0E-11 |  |
| 186                             | 92.5     | 2.6            | 92.1                        | 92.8                        | 334.2                                         | 334.2       | 35.2  | 6.8E-09 |  |
| 186                             | 94.5     | 2.3            | 94.1                        | 94.8                        | 220.2                                         | 220.2       | 30.2  | 7.4E-08 |  |
| 185                             | 92.2     | 6.1            | 91.3                        | 93.1                        | 122.6                                         | 122.6       | 4.2   | 4.2E-02 |  |
| 176                             | 92.3     | 7.0            | 91.2                        | 93.3                        | 11.9                                          | 11.9        | 0.3   | 5.9E-01 |  |
| 183                             | 88.9     | 7.4            | 87.8                        | 90.0                        | 2030.2                                        | 2030.2      | 28.4  | 1.7E-07 |  |
| 185                             | 93.9     | 2.2            | 93.6                        | 94.2                        | 0.0                                           | 0.0         | 0.0   | 1.0E+00 |  |
| 186                             | 21.5     | 4.4            | 20.8                        | 22.1                        | 1129.9                                        | 1129.9      | 27.4  | 2.7E-07 |  |
