# Supplementary material
Source: PubMed Central journal article supplement (PMC7462354)

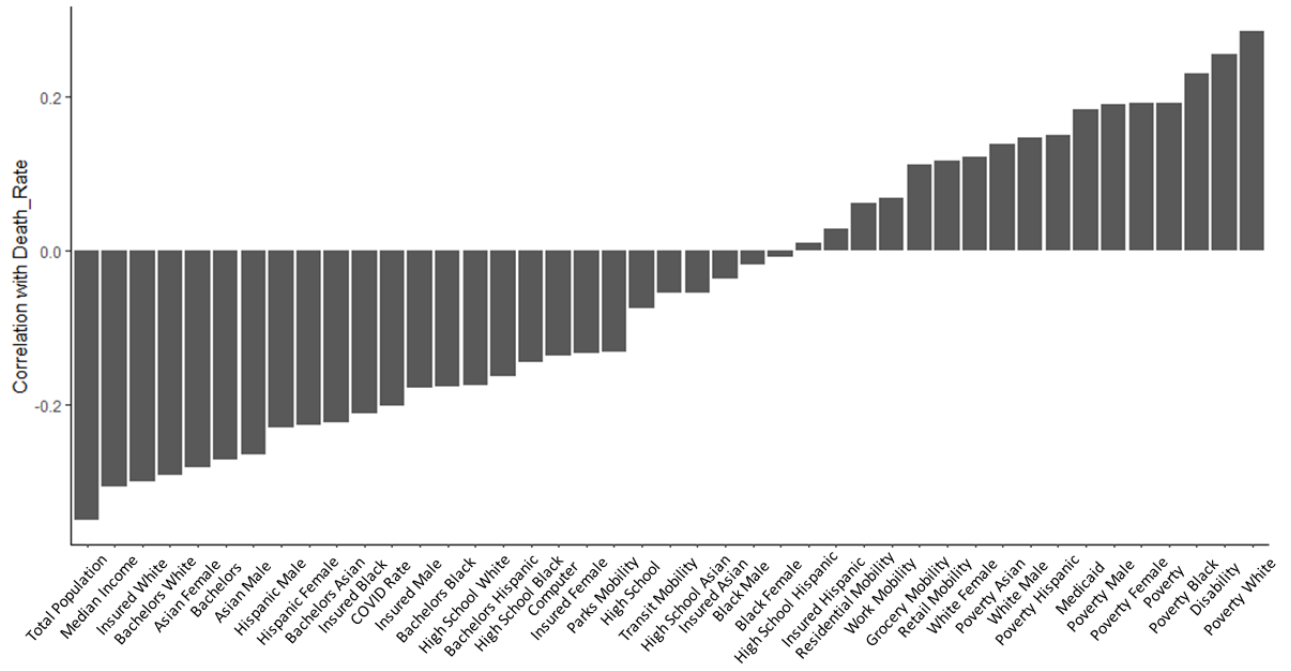

Figure S7

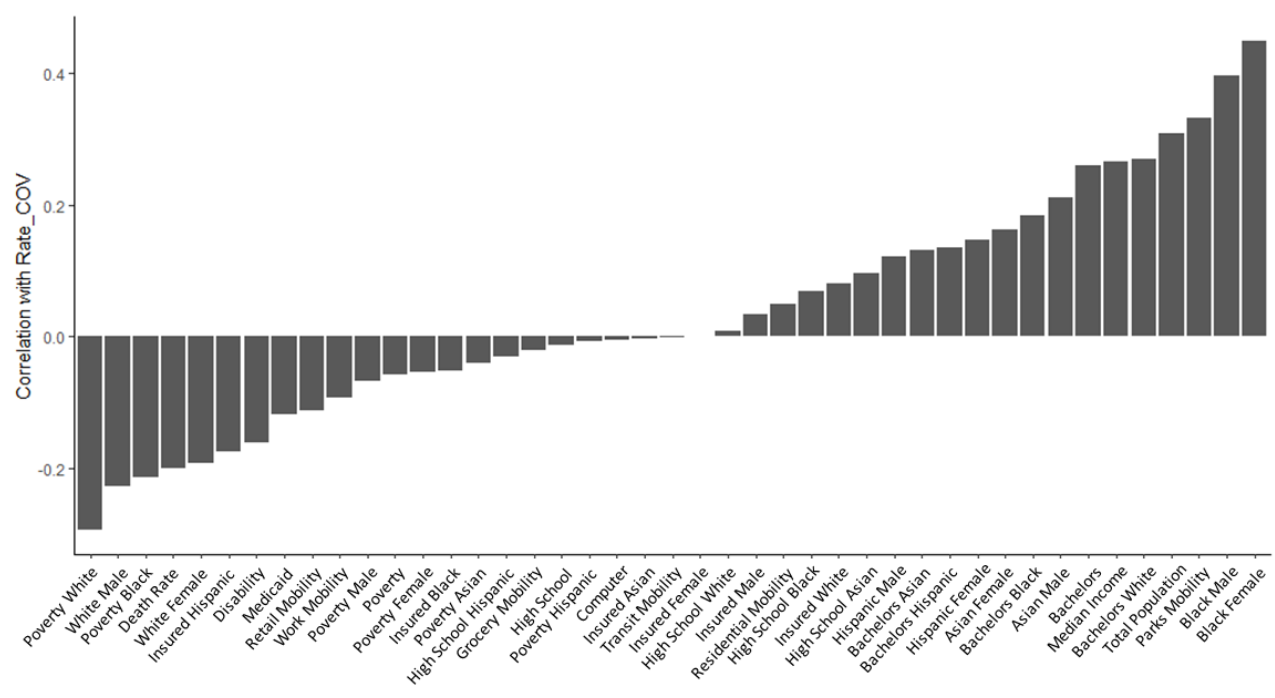

Figure S8

Supplement: 40615_2020_833_MOESM2_ESM.pdf [file 40615_2020_833_MOESM2_ESM.pdf]
